# Supplementary material for: Arabidopsis histone H3 lysine 9 methyltransferases KYP/SUVH5/6 are involved in leaf development by interacting with AS1-AS2 to repress KNAT1 and KNAT2
Source: PubMed Central journal article supplement (PMC9958104; doi:10.1038/s42003-023-04607-6), 2023-02-24

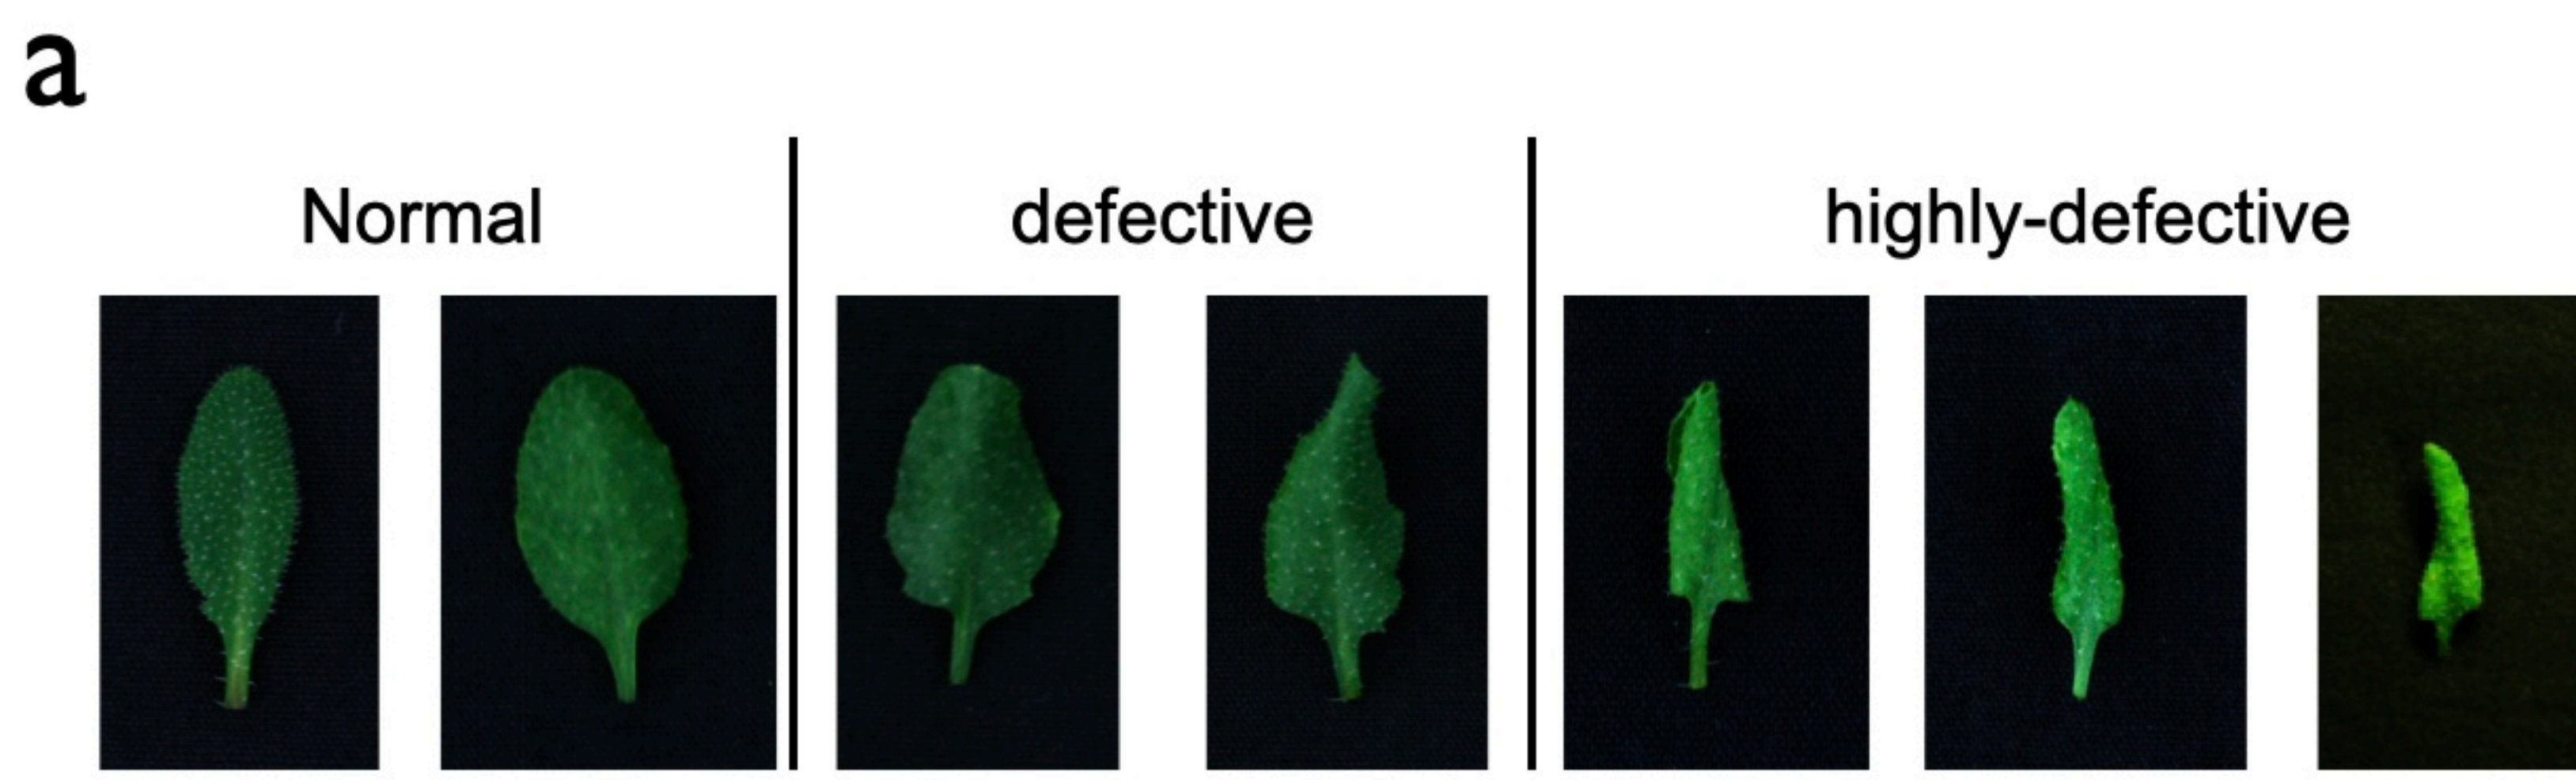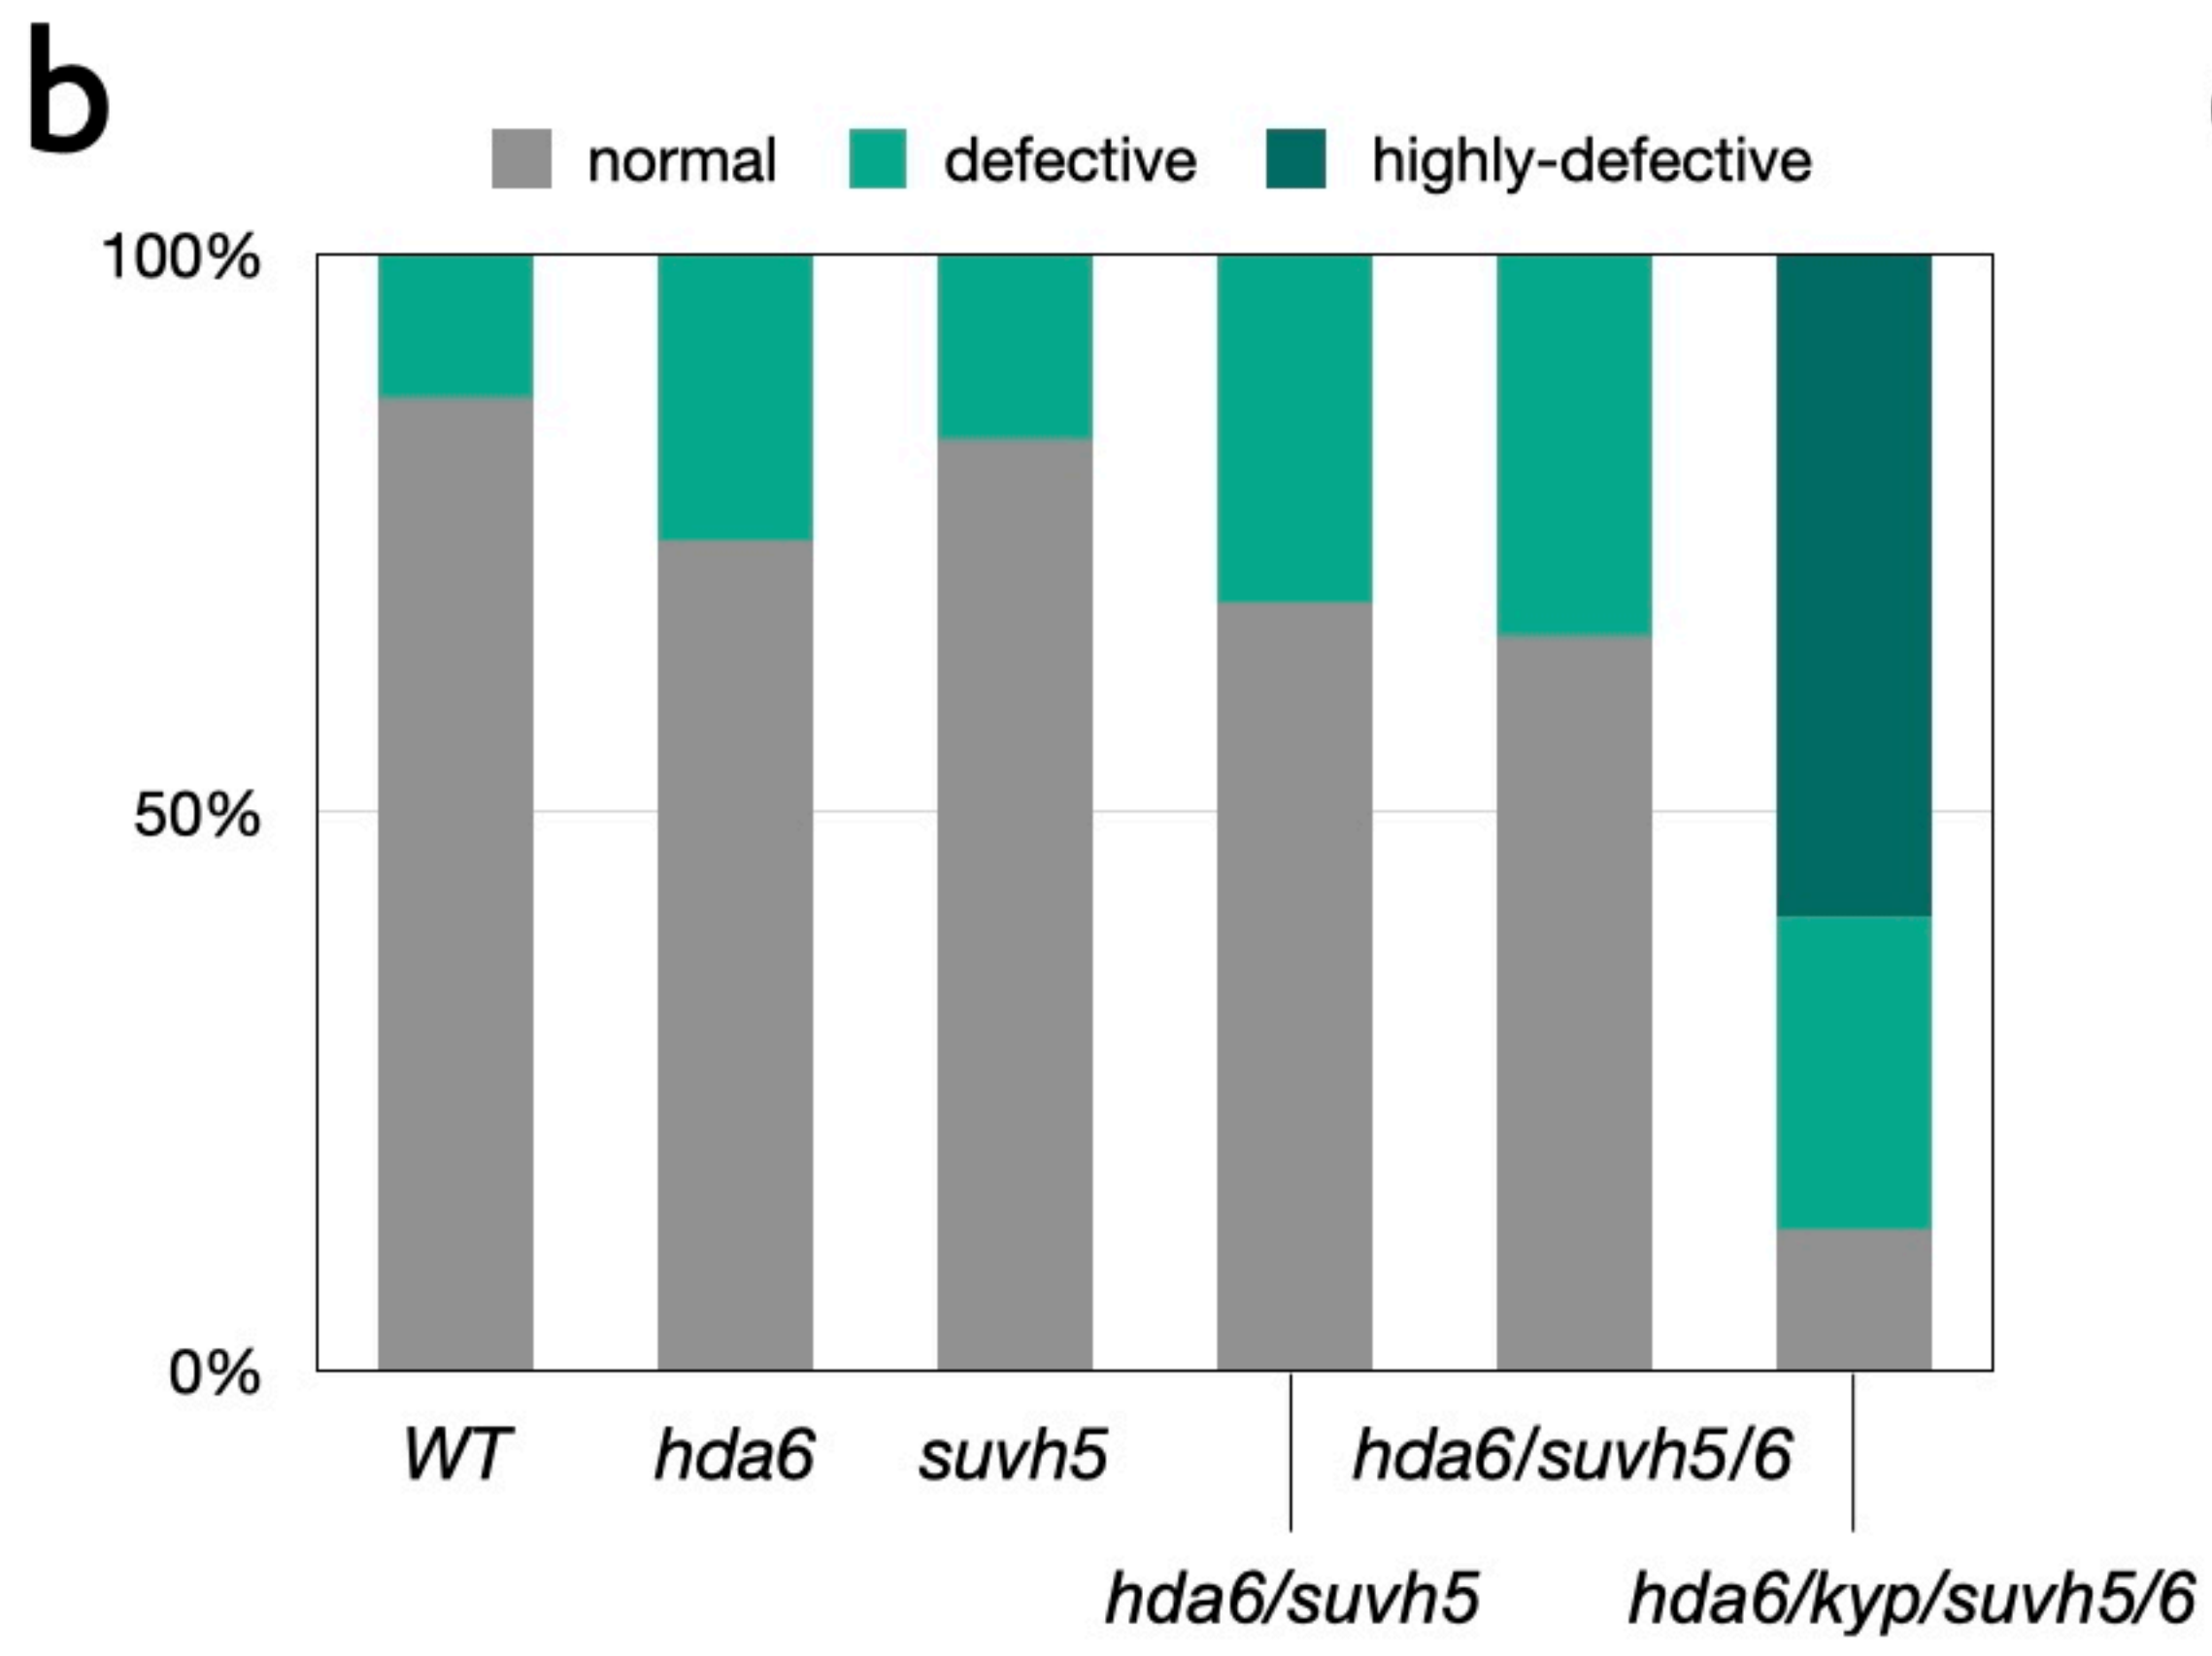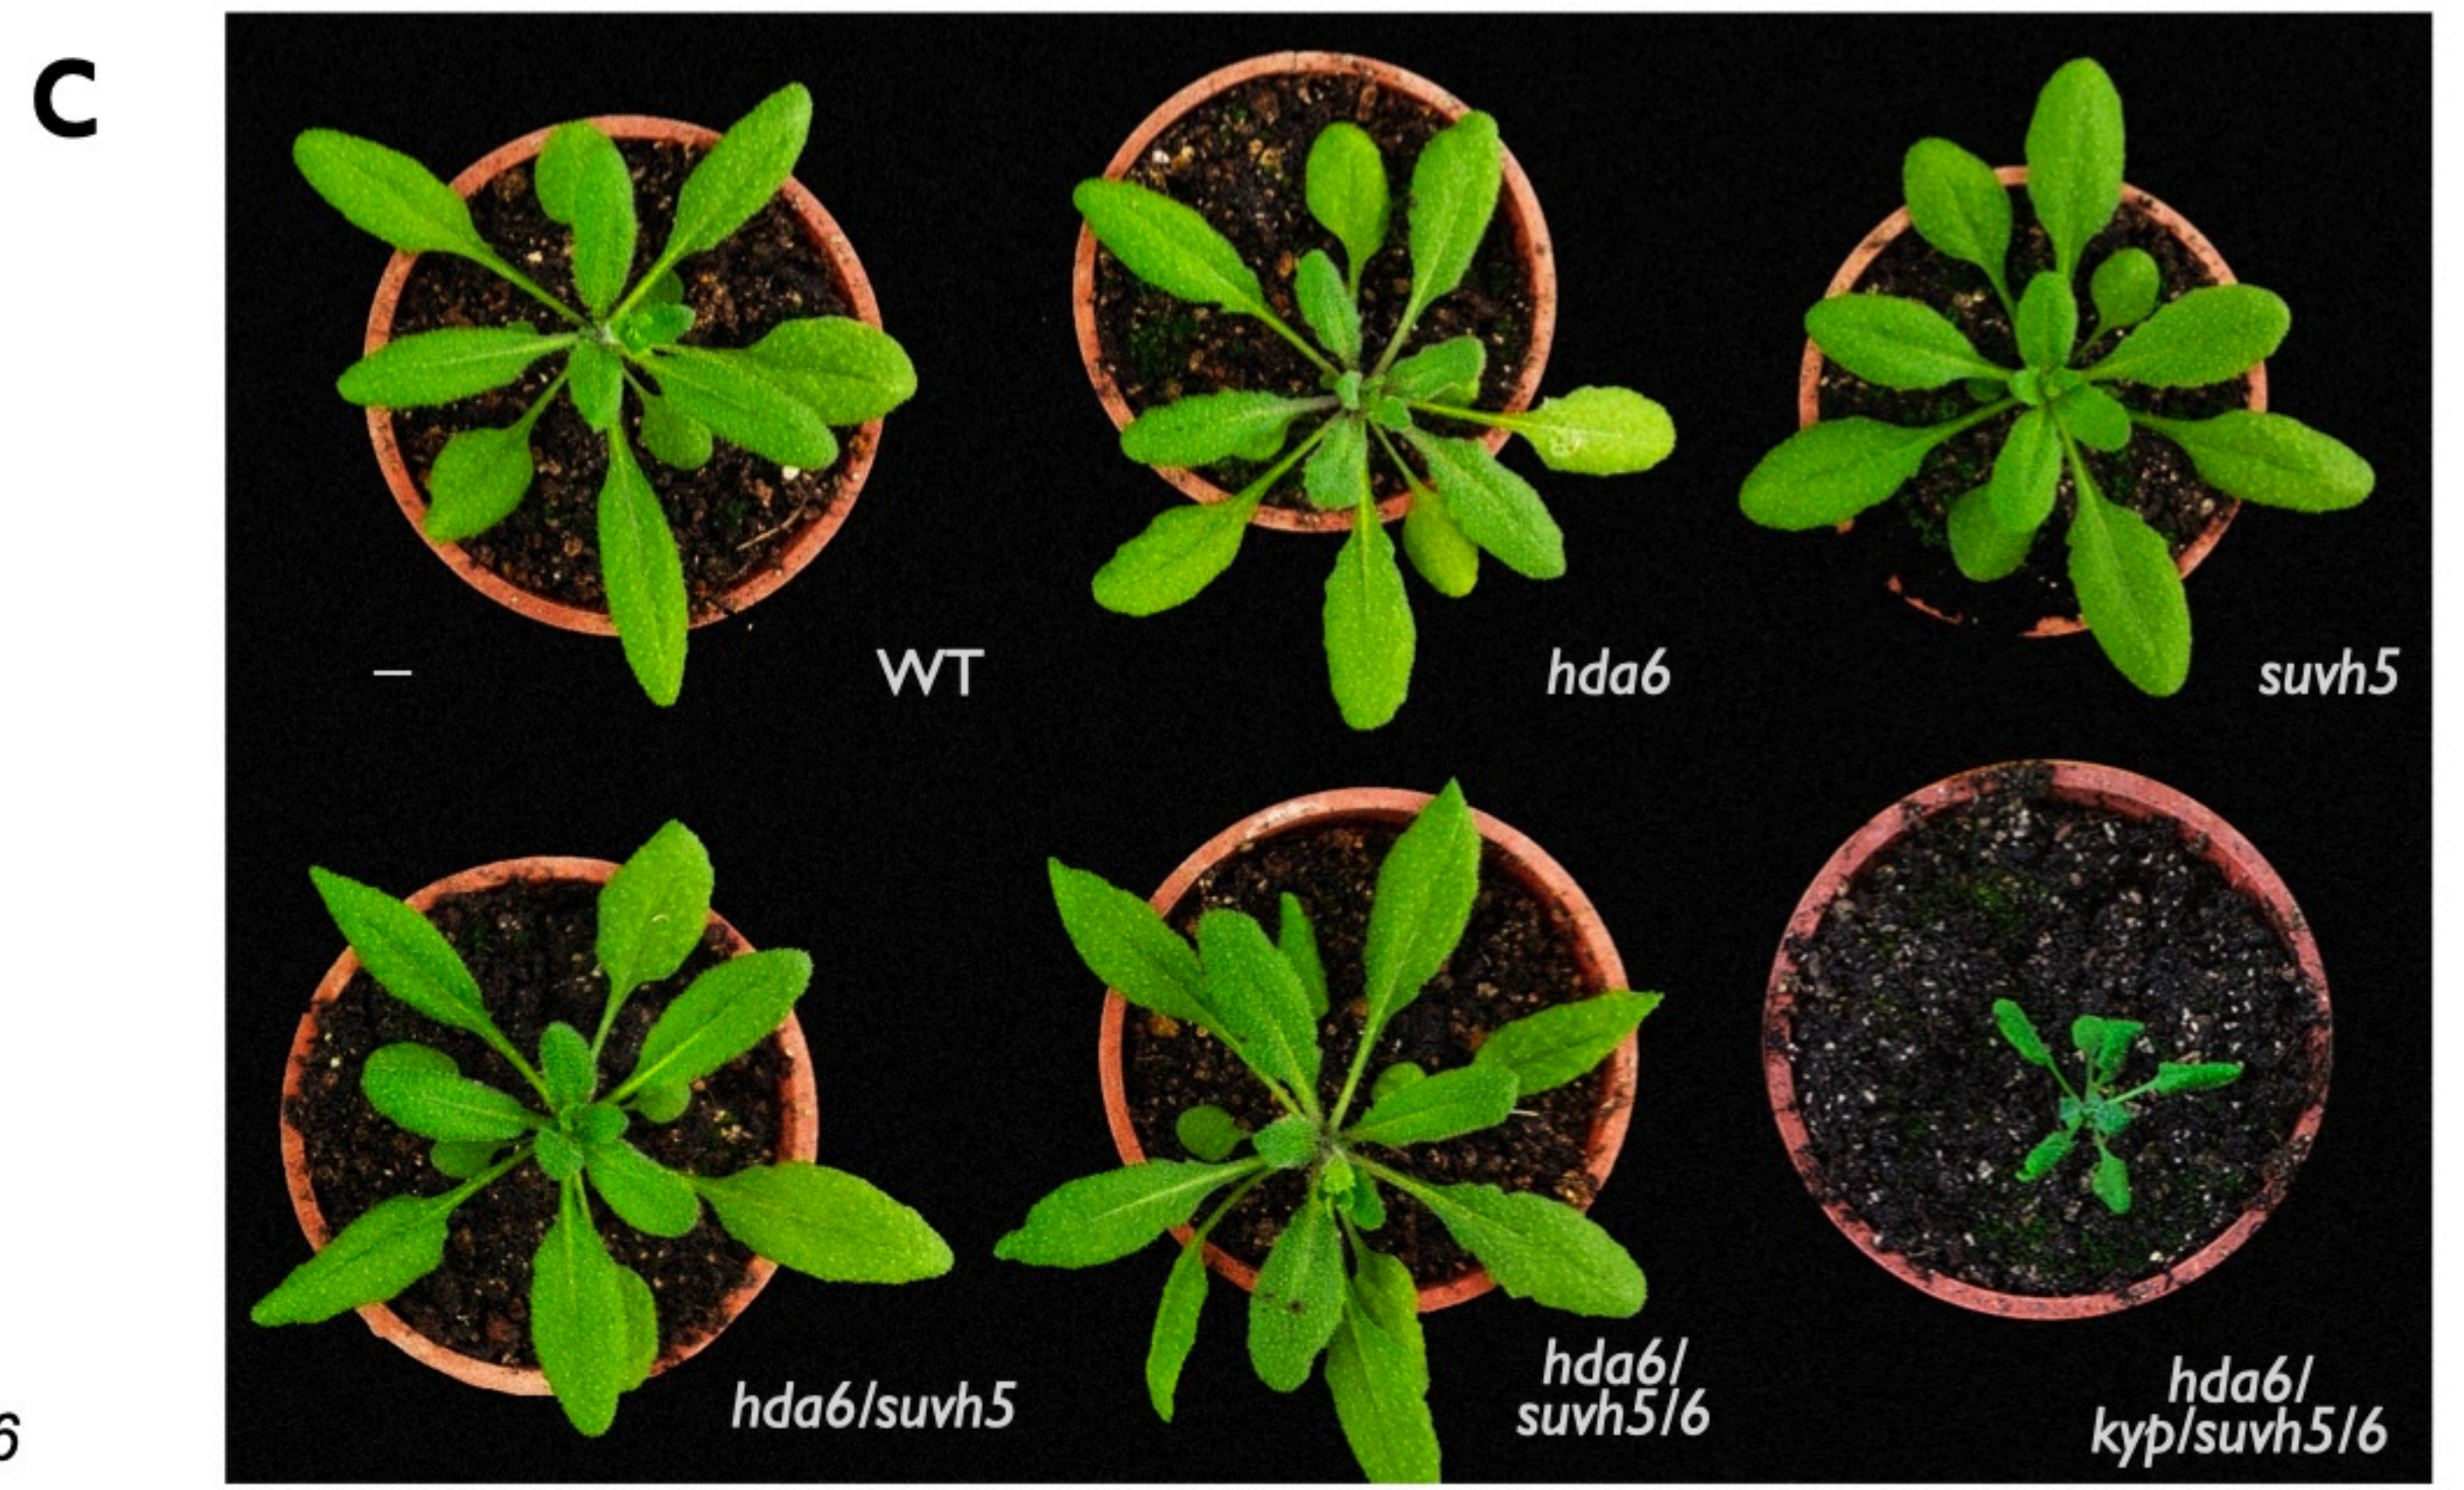

**Figure S1. *Arabidopsis* KYP, SUVH5 and SUVH6 are involved in leaf development.**

(a) Sample photos of the normal, defected and highly-defected leaves.

(b, c) Quantitative analysis (b) and phenotypes (c) of leaves on WT, *hda6*, *suvh5*, *hda6/suvh5/6* and *hda6/kyp/suvh5/6* mutant plants. The fourth pair rosette leaves of each plant were classified as normal, defective and highly-defected leaves. Frequency is defined as the ratio of the number of leaves examined. Bars= 5mm.

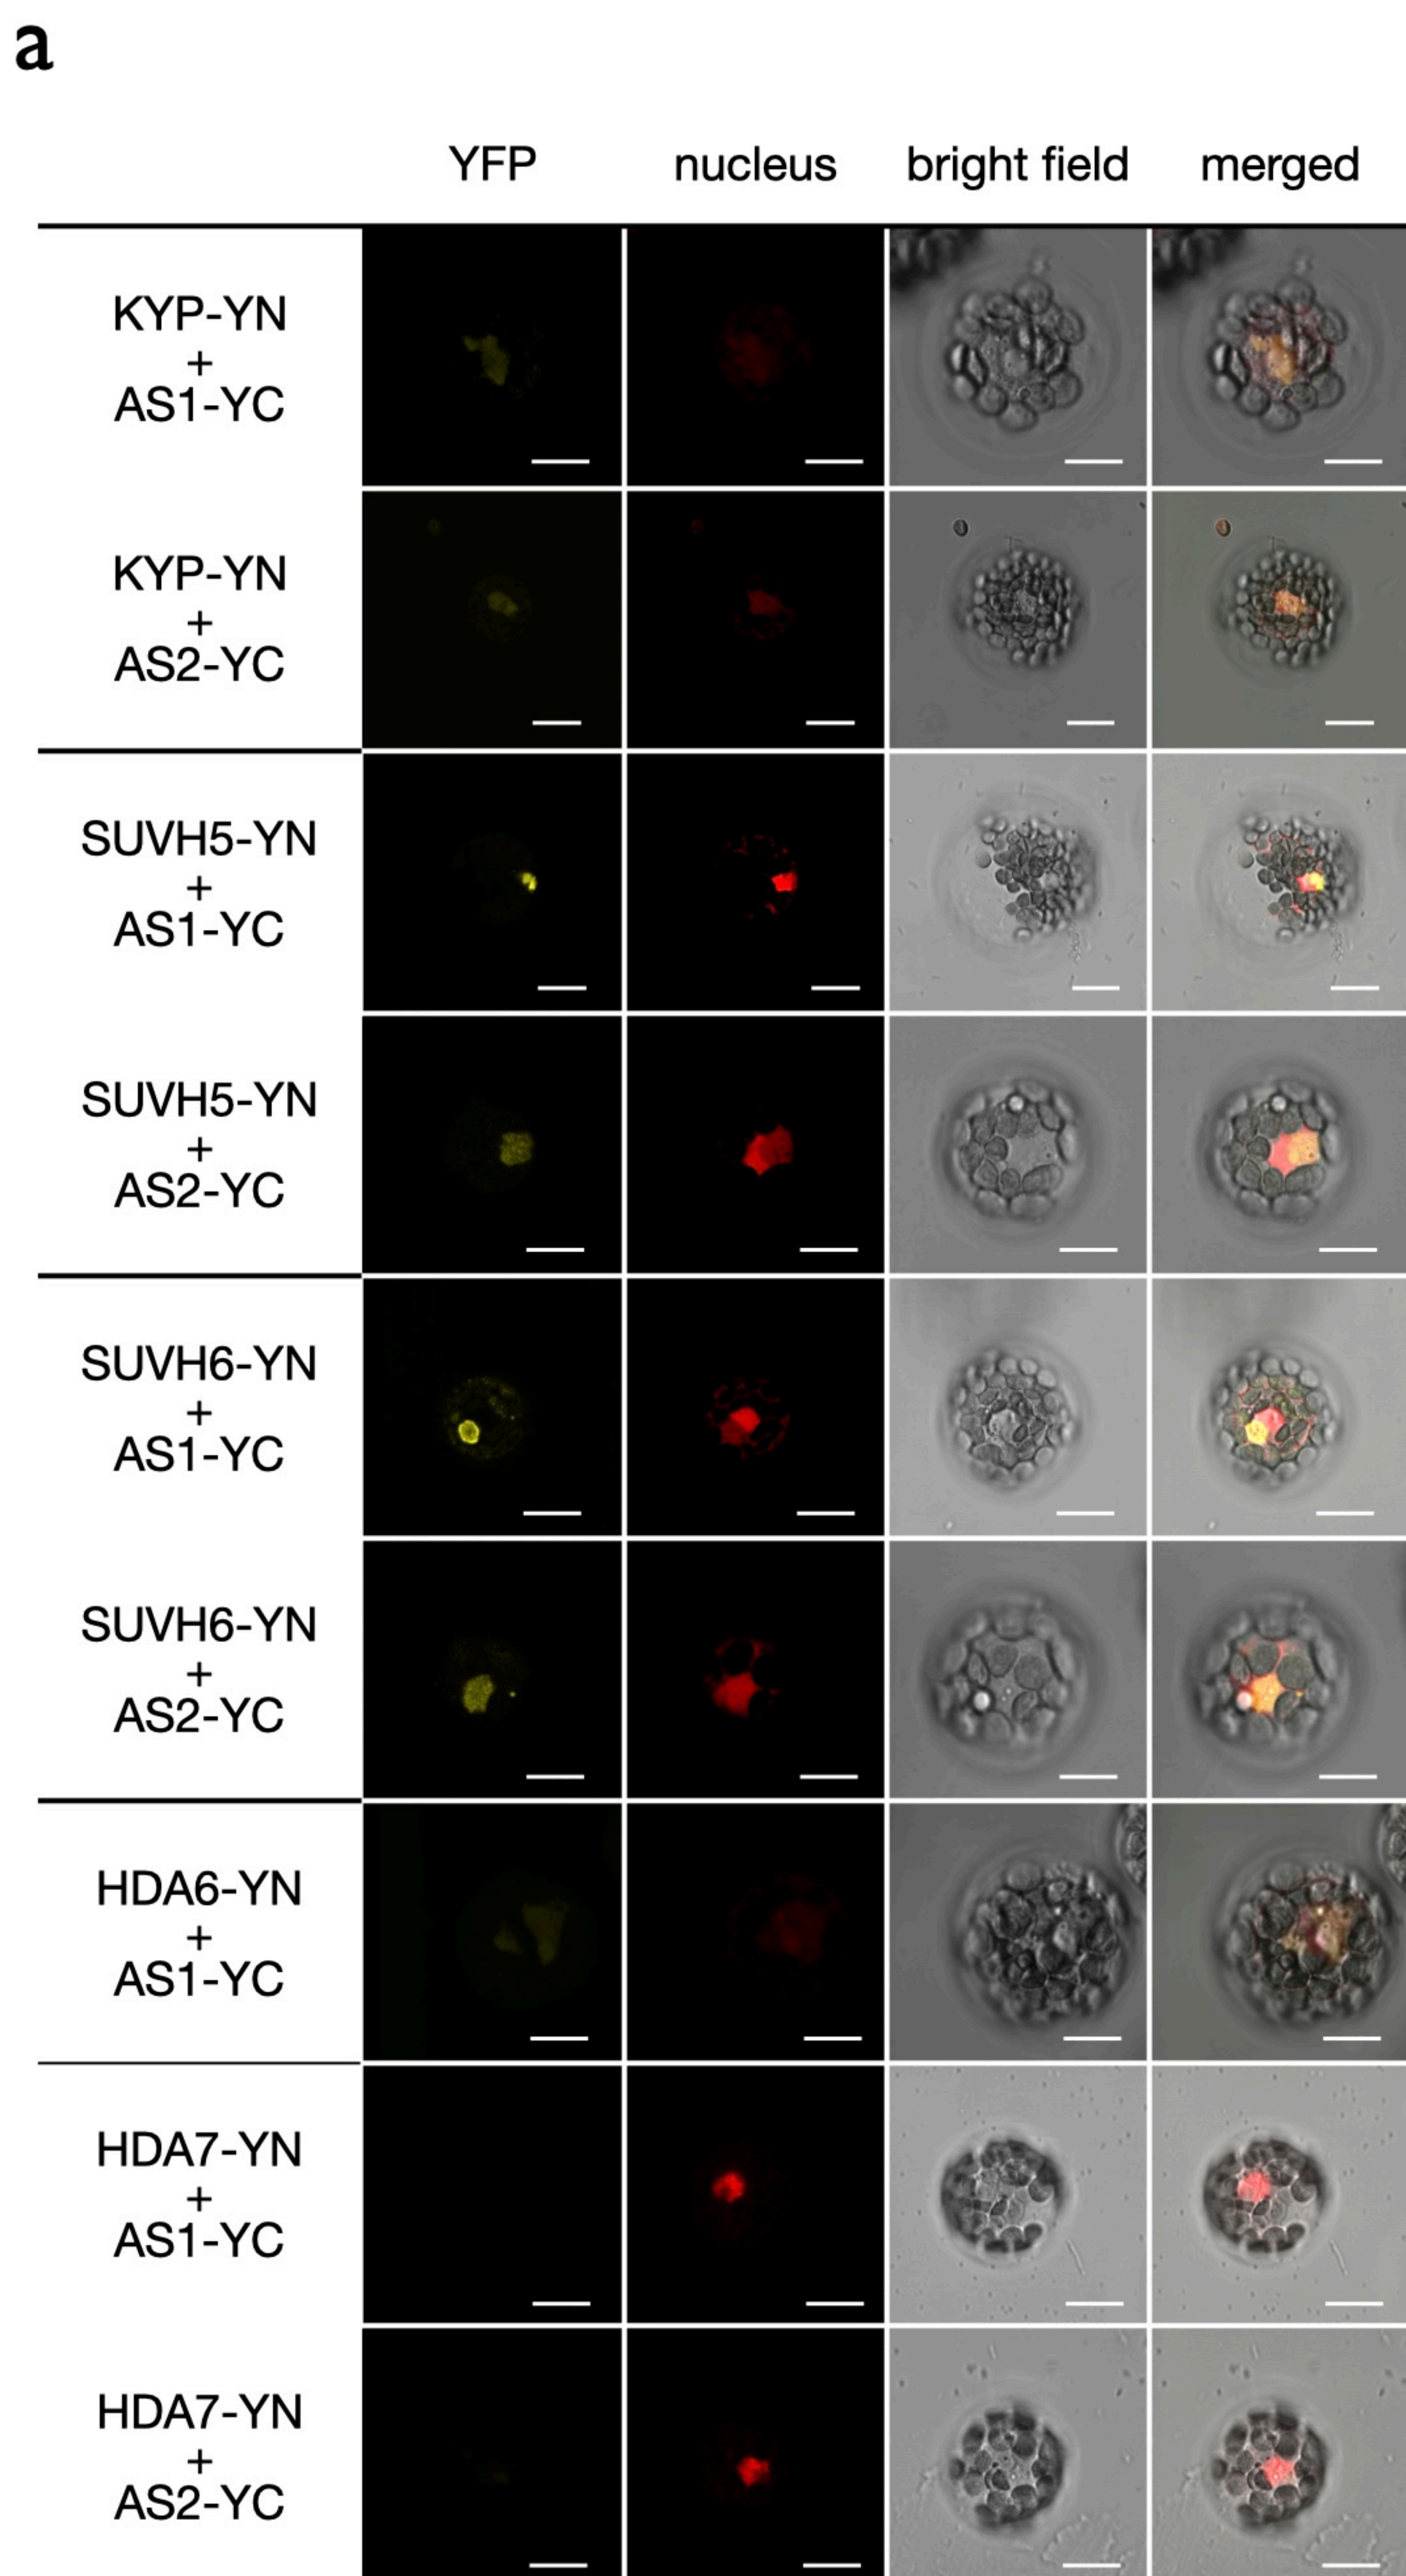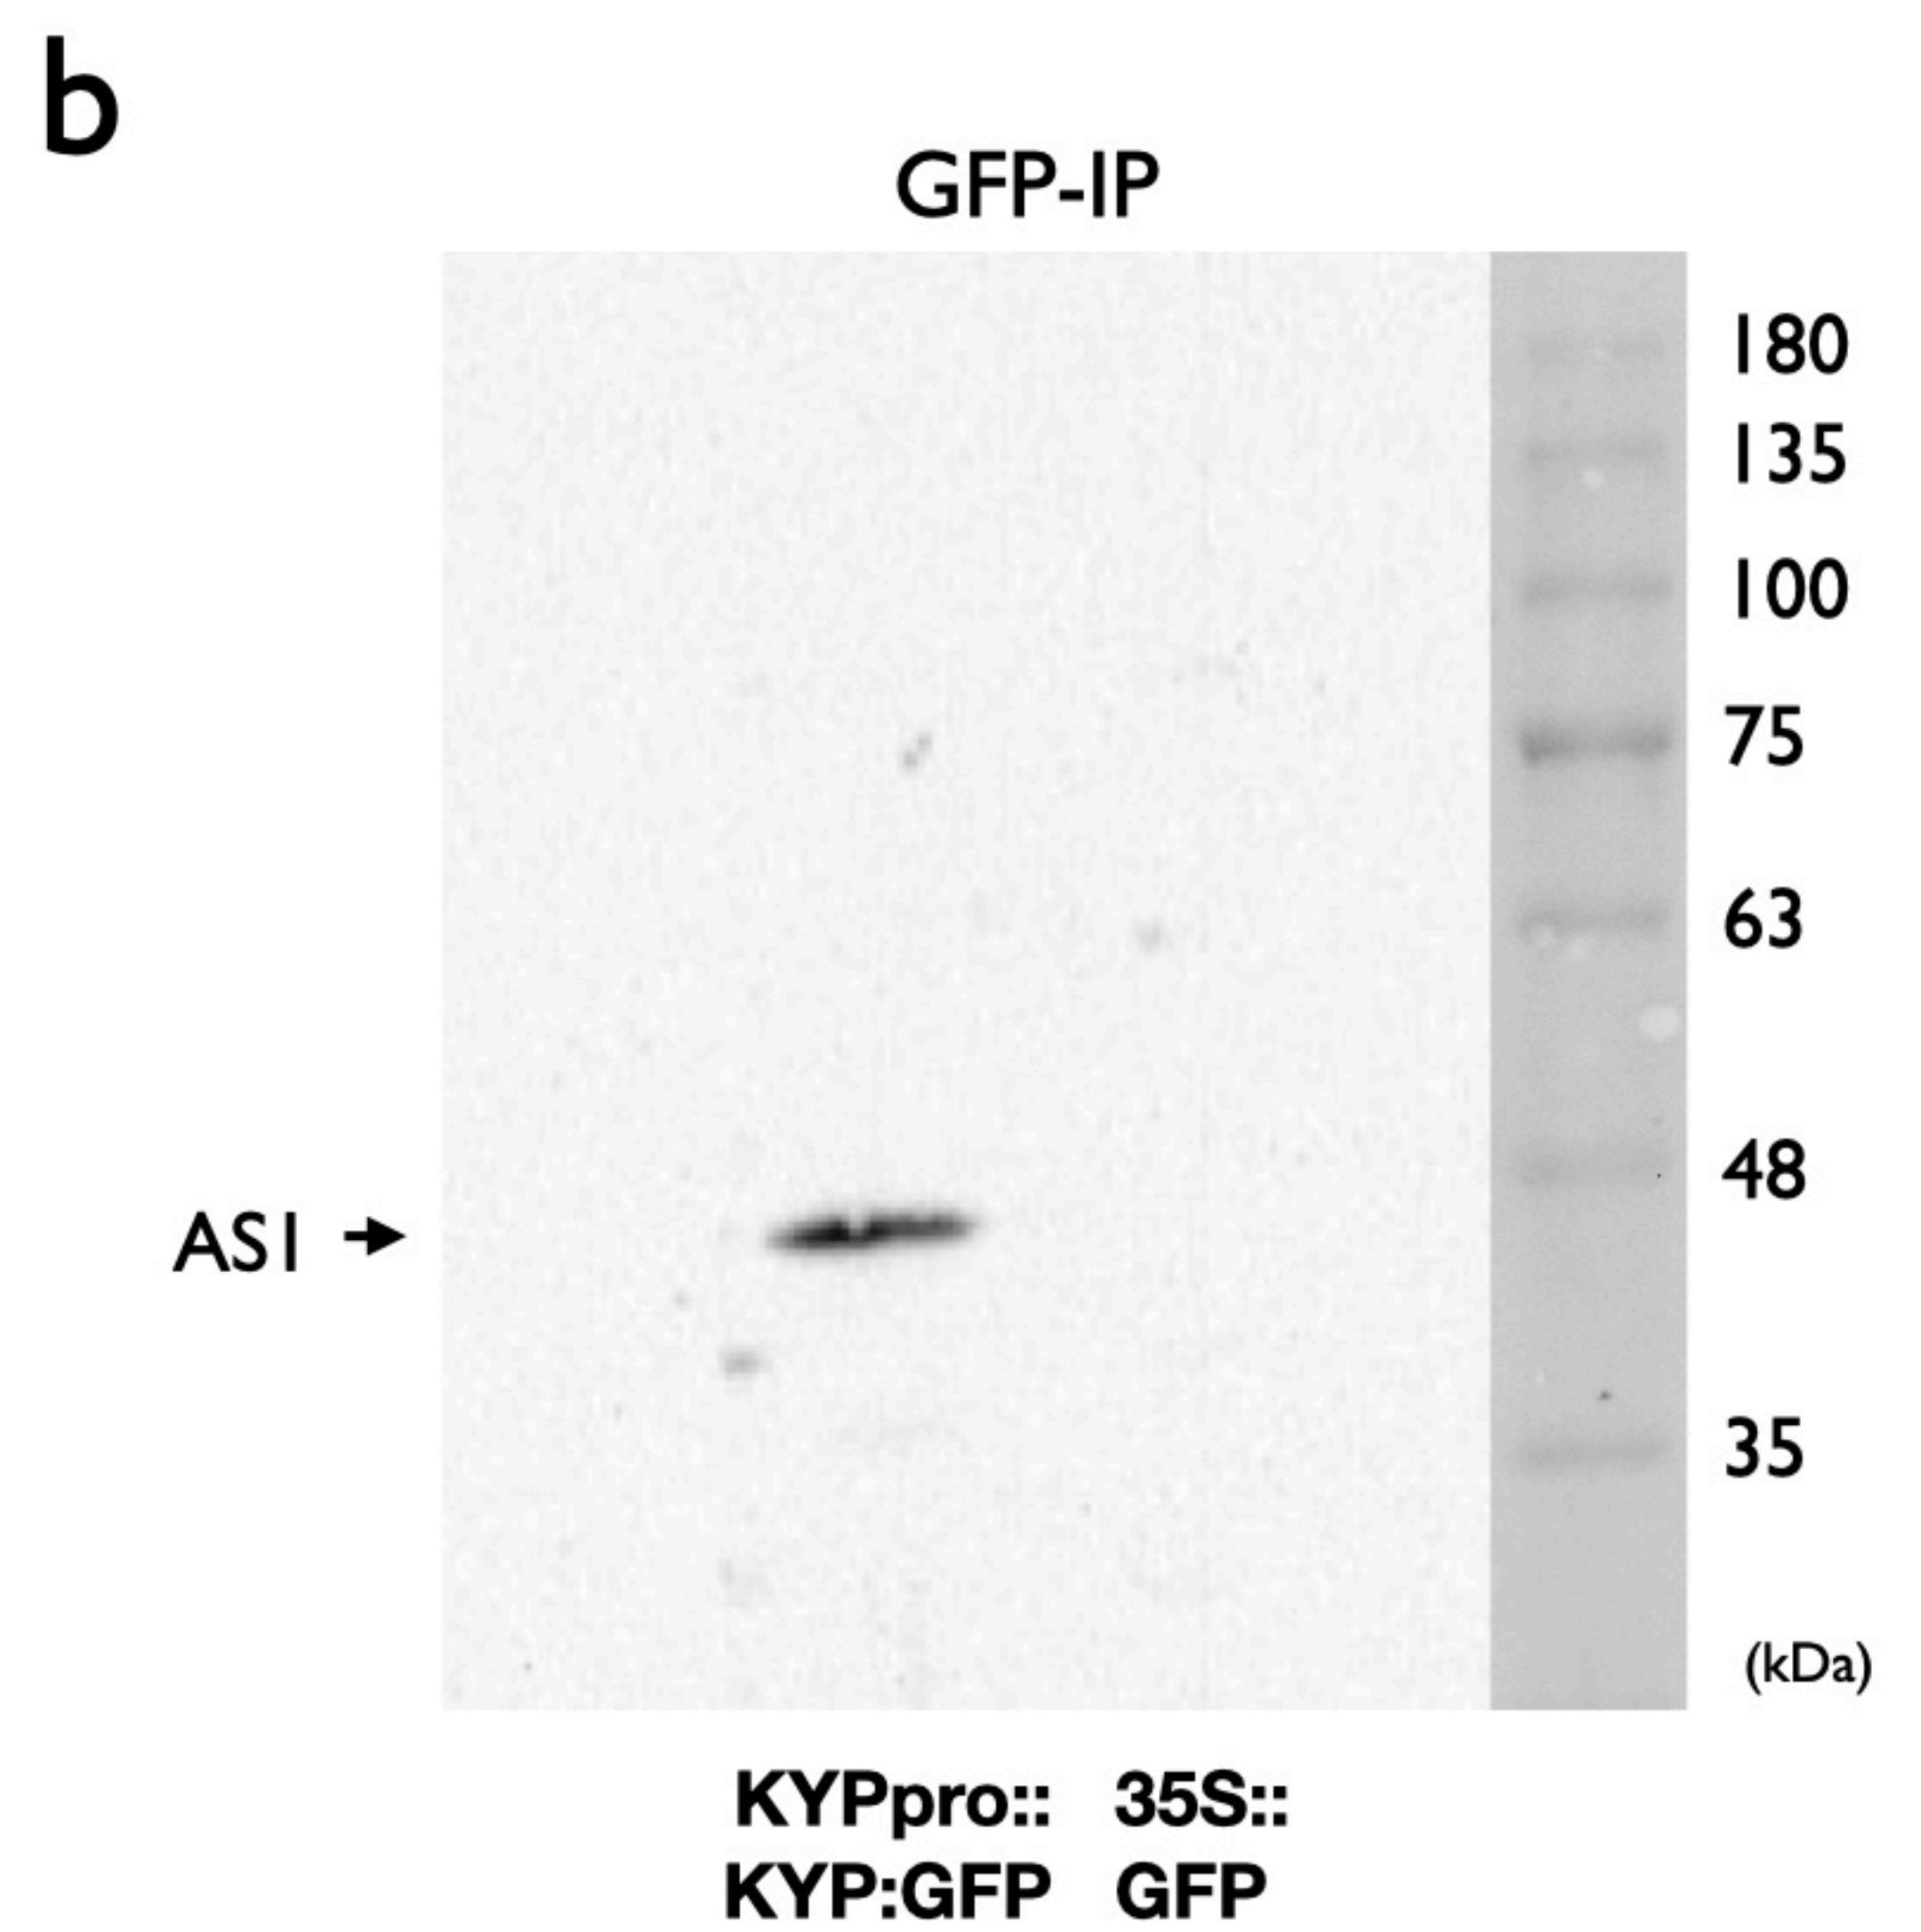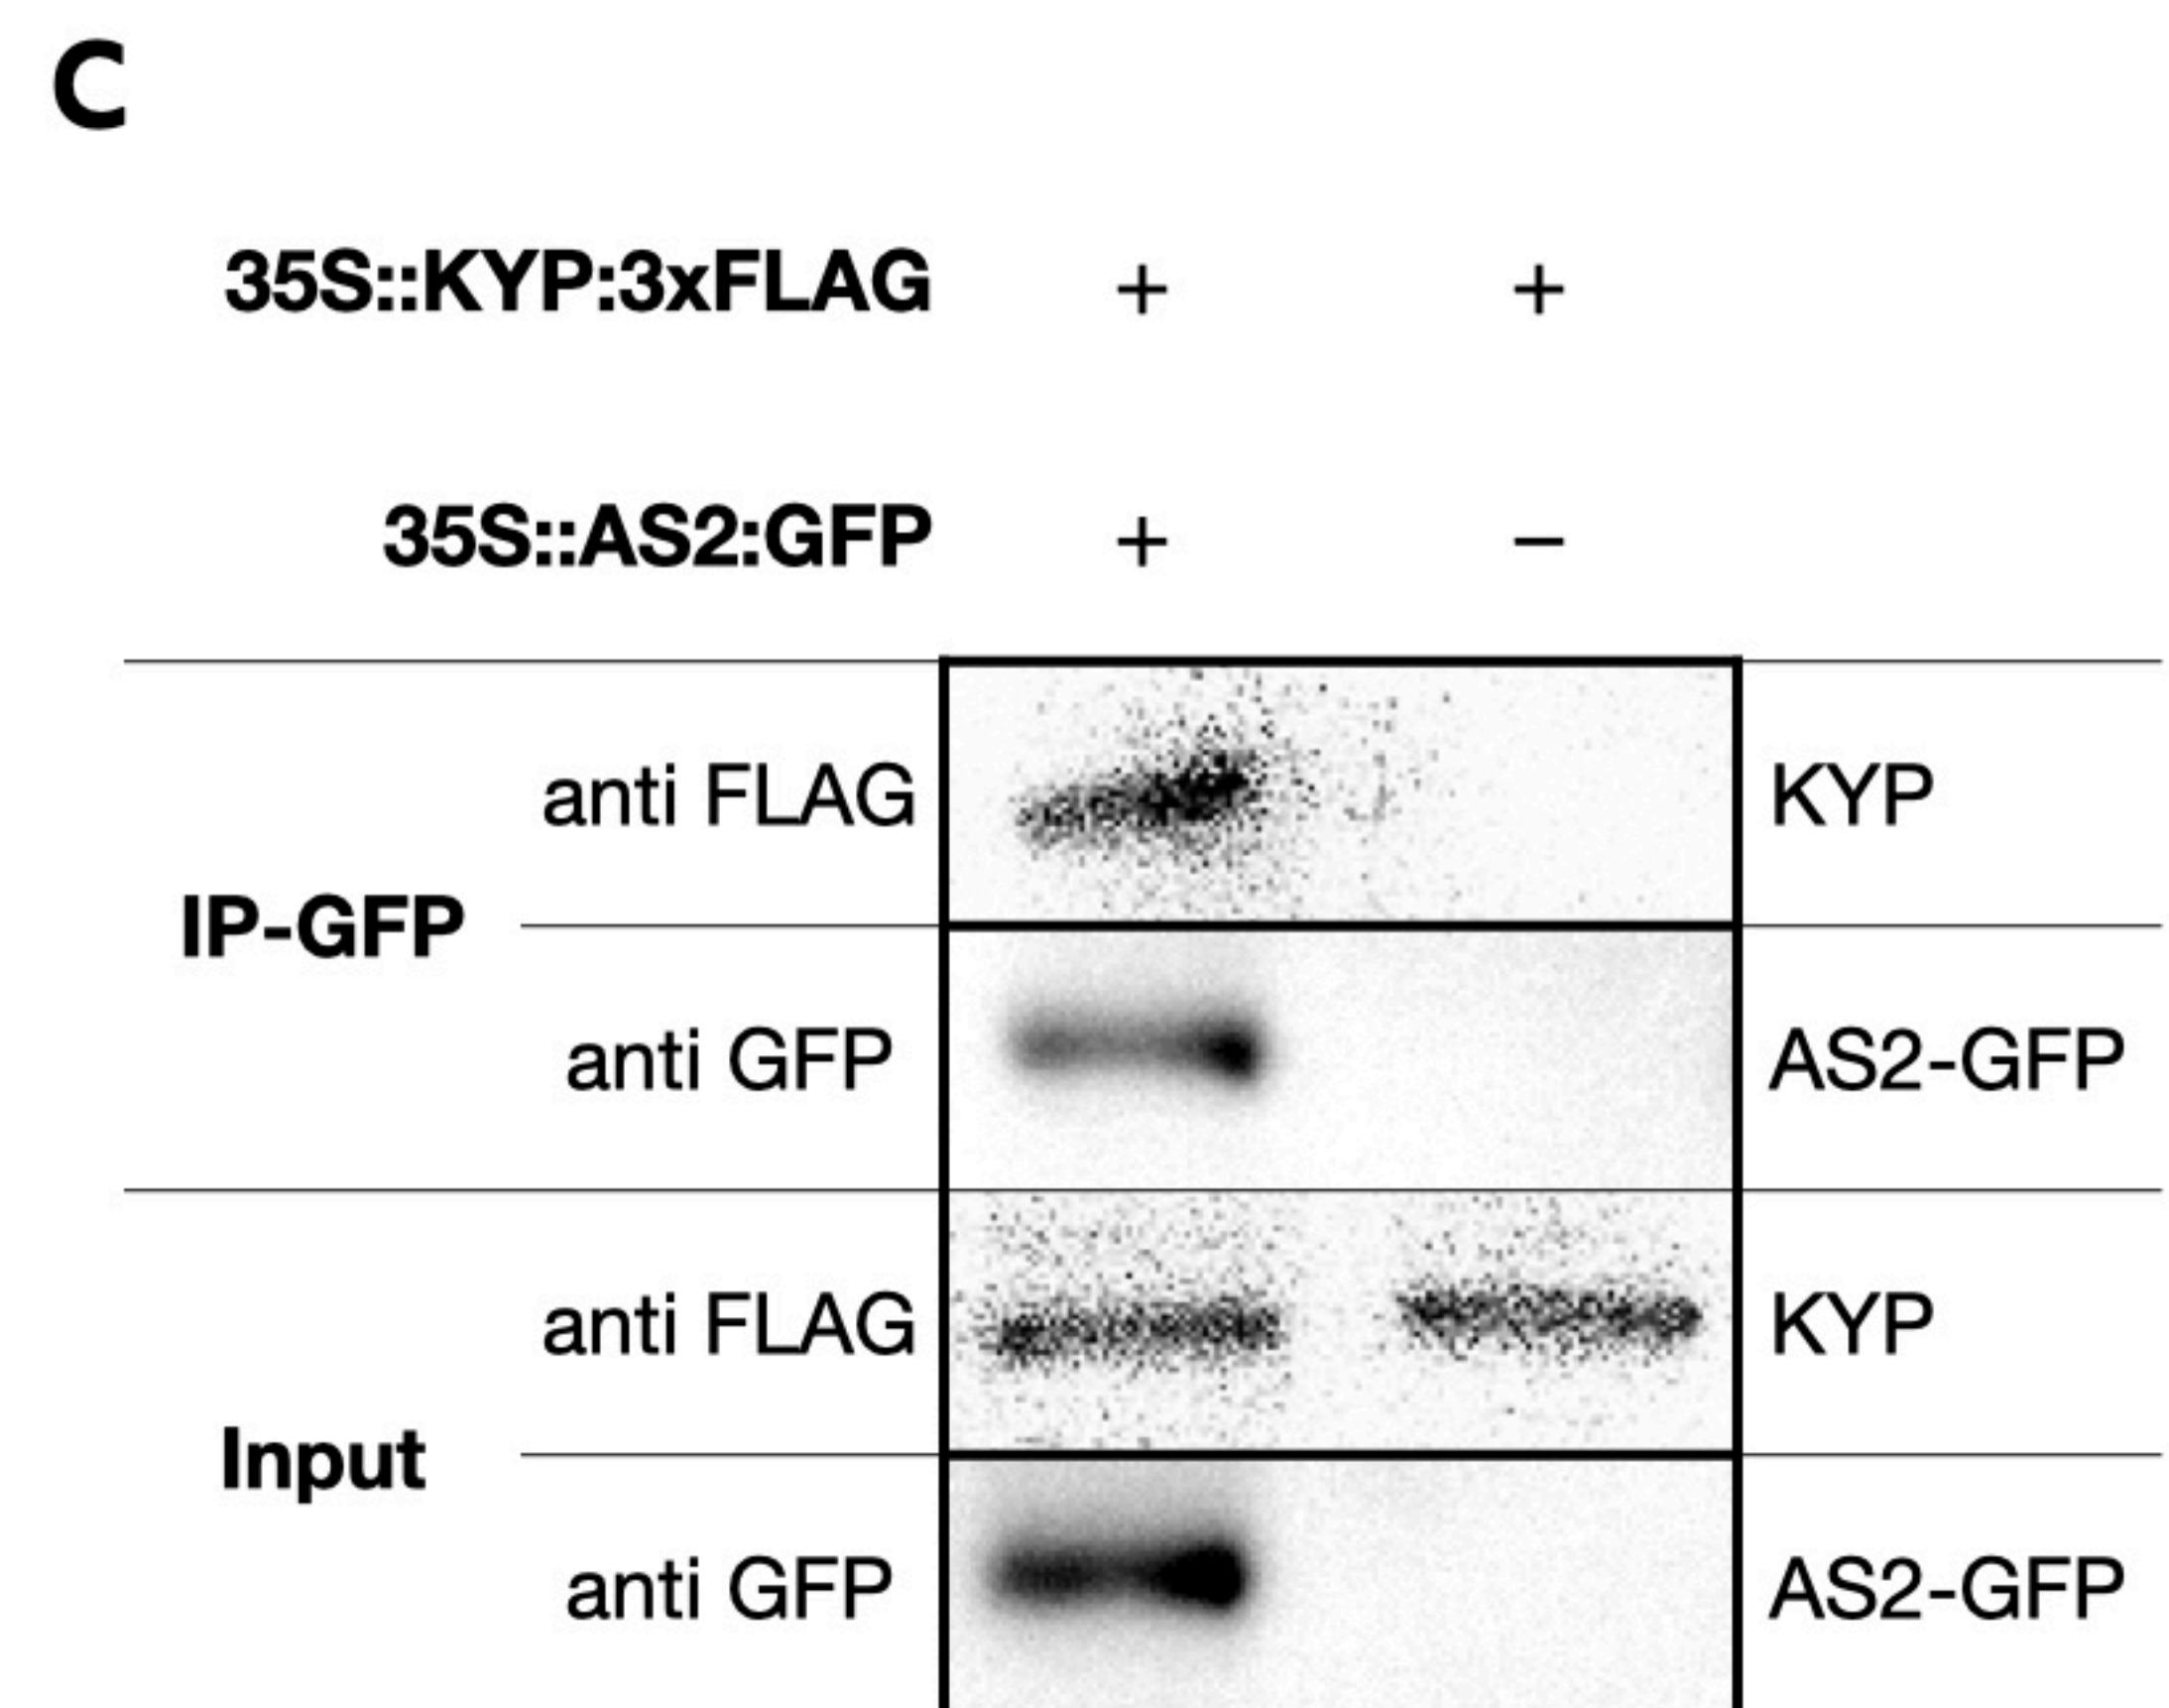

**d**

|         | Kd           | R <sup>2</sup> |
|---------|--------------|----------------|
| AS1-AS2 | 35.1±13.2 μM | 0.97           |
| AS1-KYP | 33.6±0.43 μM | 0.98           |
| AS2-KYP | 18.6±13.7 μM | 0.99           |

**Figure S2. KYP, SUVH5 and SUVH6 interact with AS1 and AS2.**

(a) BiFC assays in *Arabidopsis* protoplast showing interaction of KYP, SUVH5 and SUVH6 with AS1 and AS2 in living cells. Different regions of KYP, SUVH5, SUVH6 and AS1/2 proteins were fused with the N terminus (YN) or C terminus (YC) of YFP and co-delivered into protoplasts. The nucleus was indicated by mCherry carrying a nuclear localization signal. Bars= 10μm.

(b) Western blot showing AS1 co-immunoprecipitated by KYP:GFP in transformed *Arabidopsis*.

(c) Co-IP of KYP:3xFLAG and AS2:GFP in transformed *Arabidopsis* protoplasts. Western blot was performed with the indicated antibodies.

(d) Table of the dissociation rate constant (Kd) values were measured among AS1, AS2, and KYP recombinant protein pairs in the QCM assay. The average Kd and standard deviation values were obtained from 3 replicates of AS1-AS2, AS1-KYP, and AS2-KYP pairs.

**a**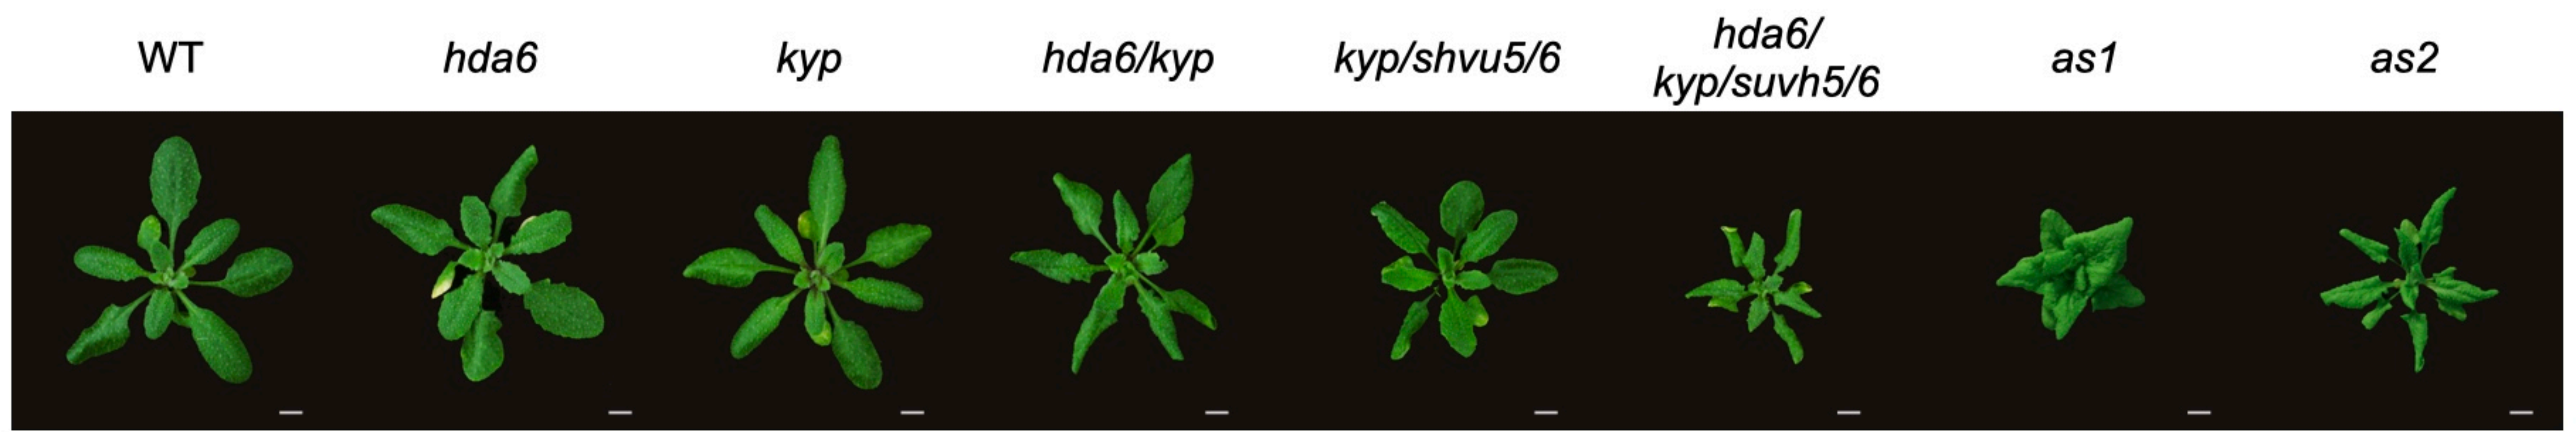**b**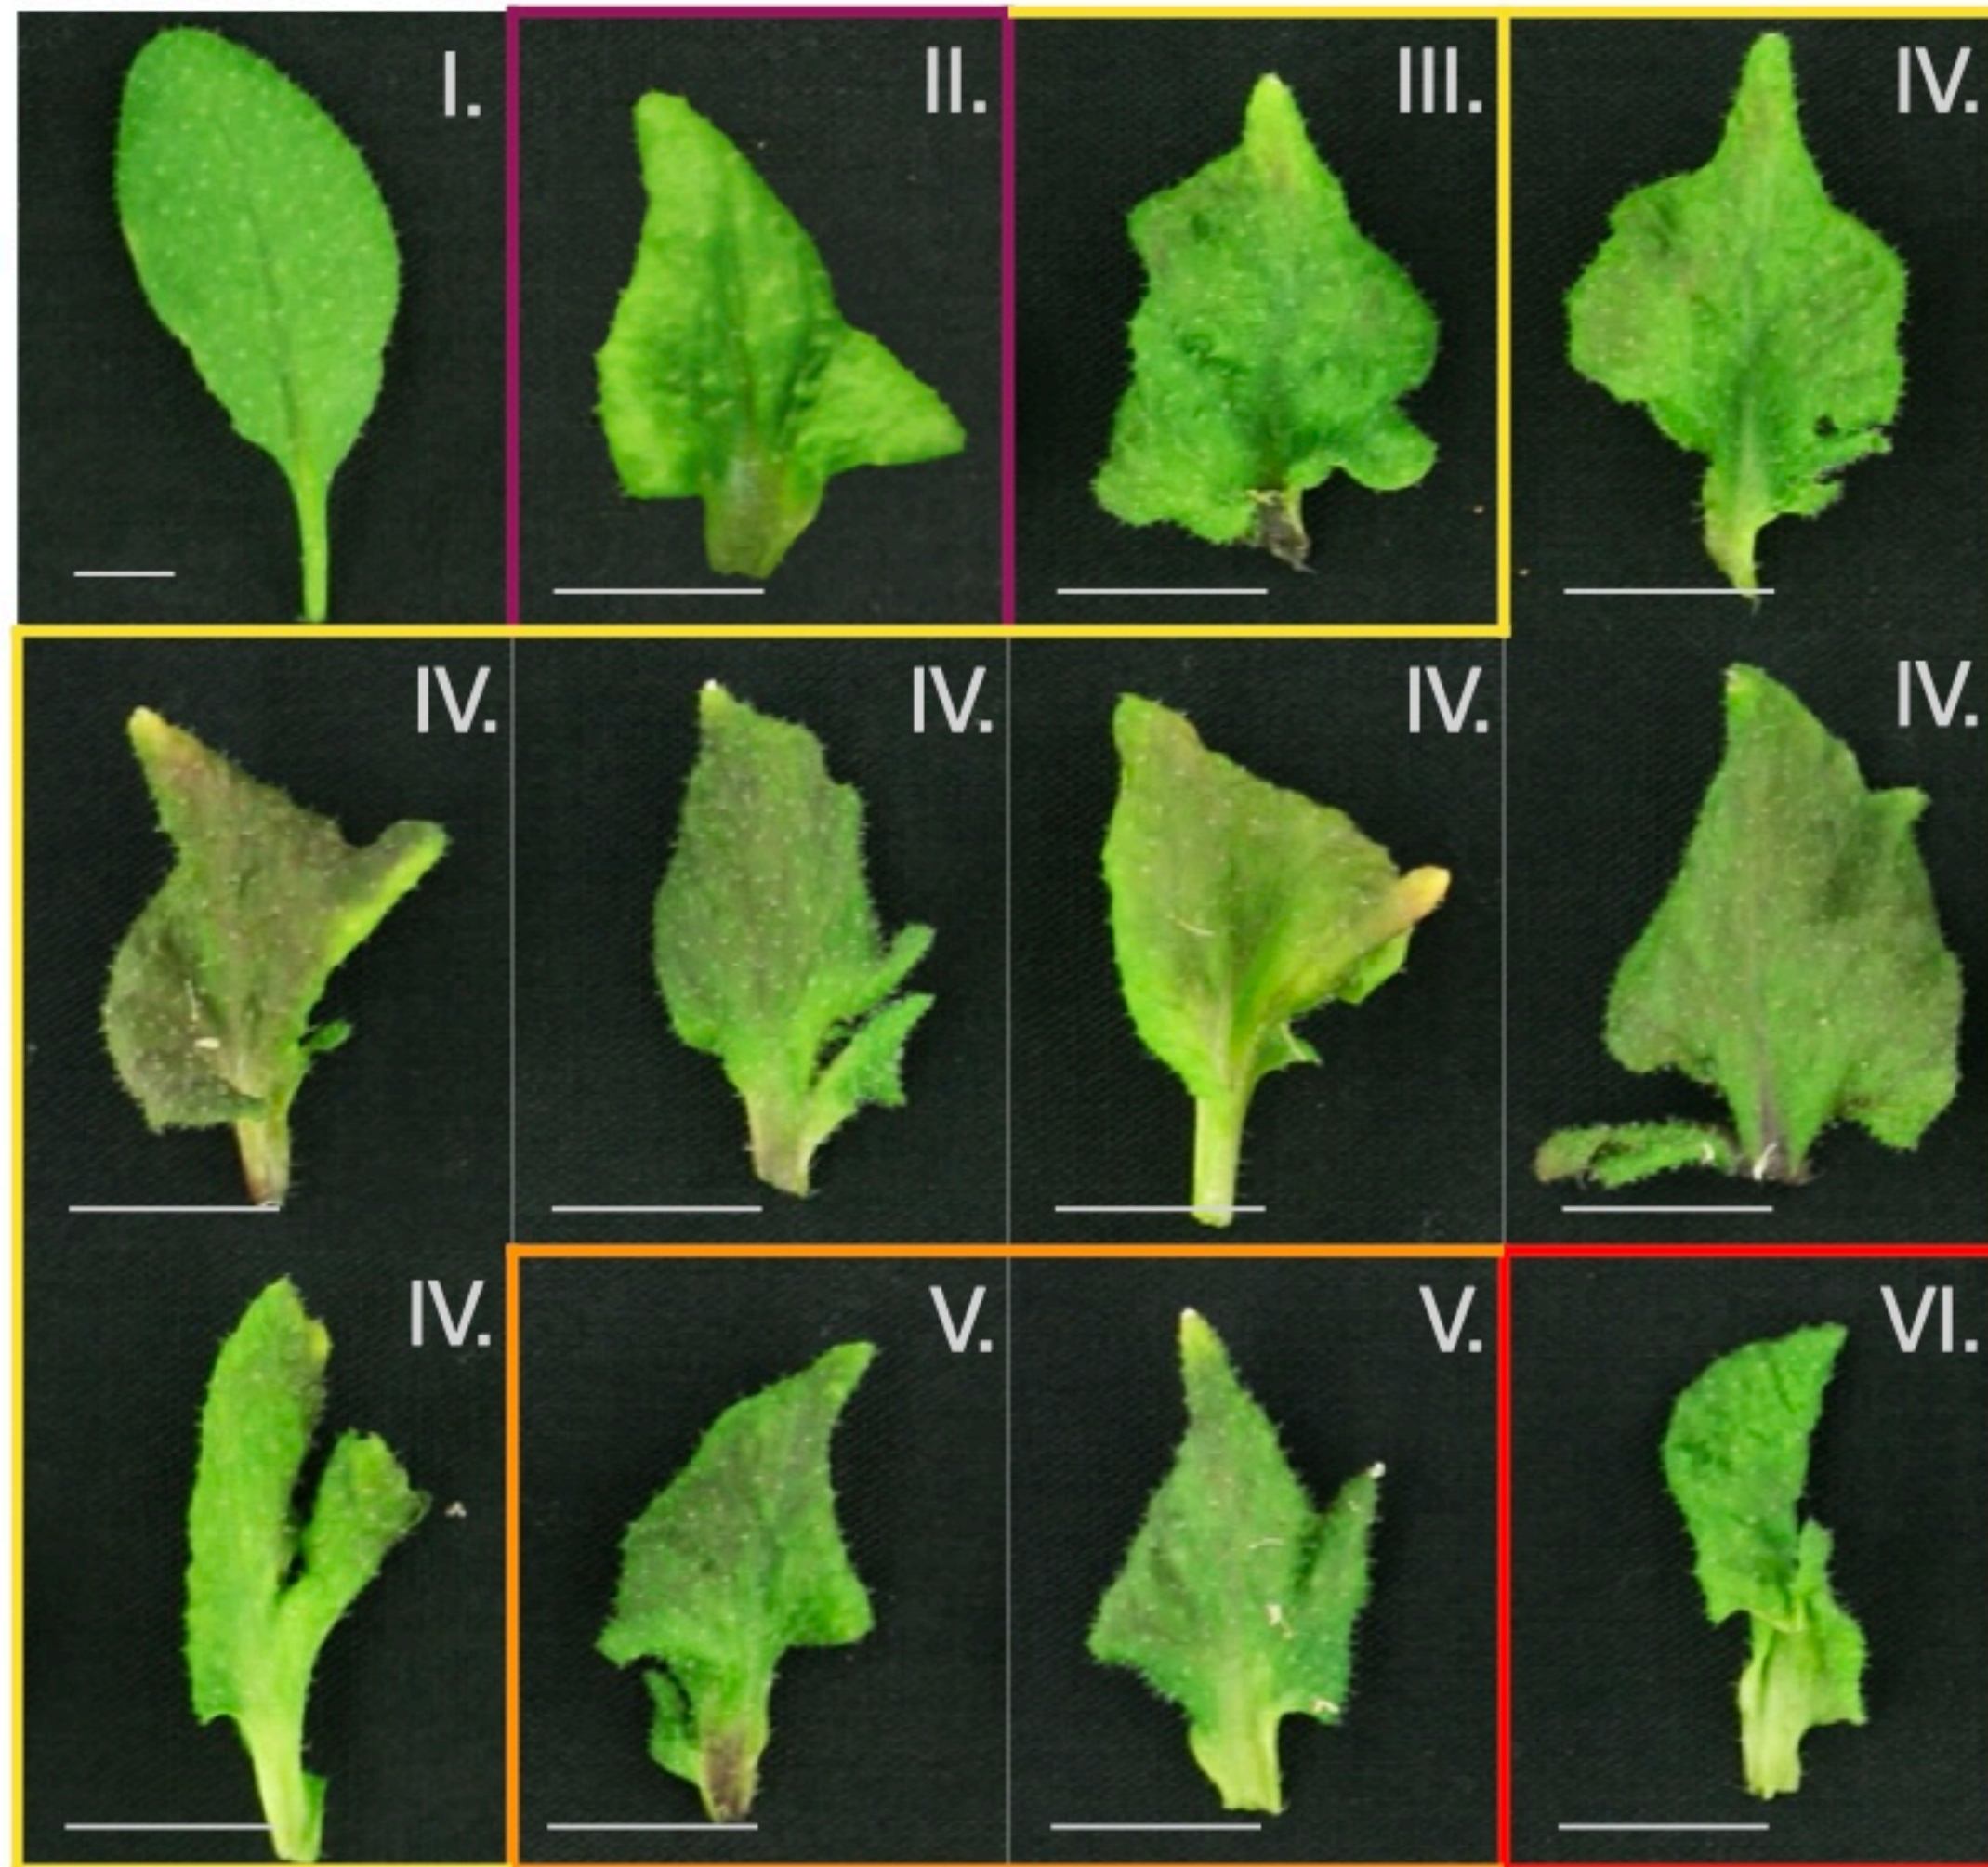

- I. WT
- II. *as1*
- III. *as1/kyp*
- IV. *as1/hda6/kyp*
- V. *as1/hda6/kyp/shvu6(hetro)*
- VI. *as1/hda6/kyp/shvu6(homo)*

**Figure S3. the function of KYP/SUVH5/6 in leaf development is depending on AS1.**

(a) Leaf development phenotype of WT, *hda6*, *kyp*, *kyp/hda6*, *kyp/suvh5/6* and *hda6/kyp/suvh5/6* mutant plants.

(b) Leaf development phenotype of WT and indicated mutant plants.

Bars= 5mm. Plants were grown at 22°C under long-day for 20 days.

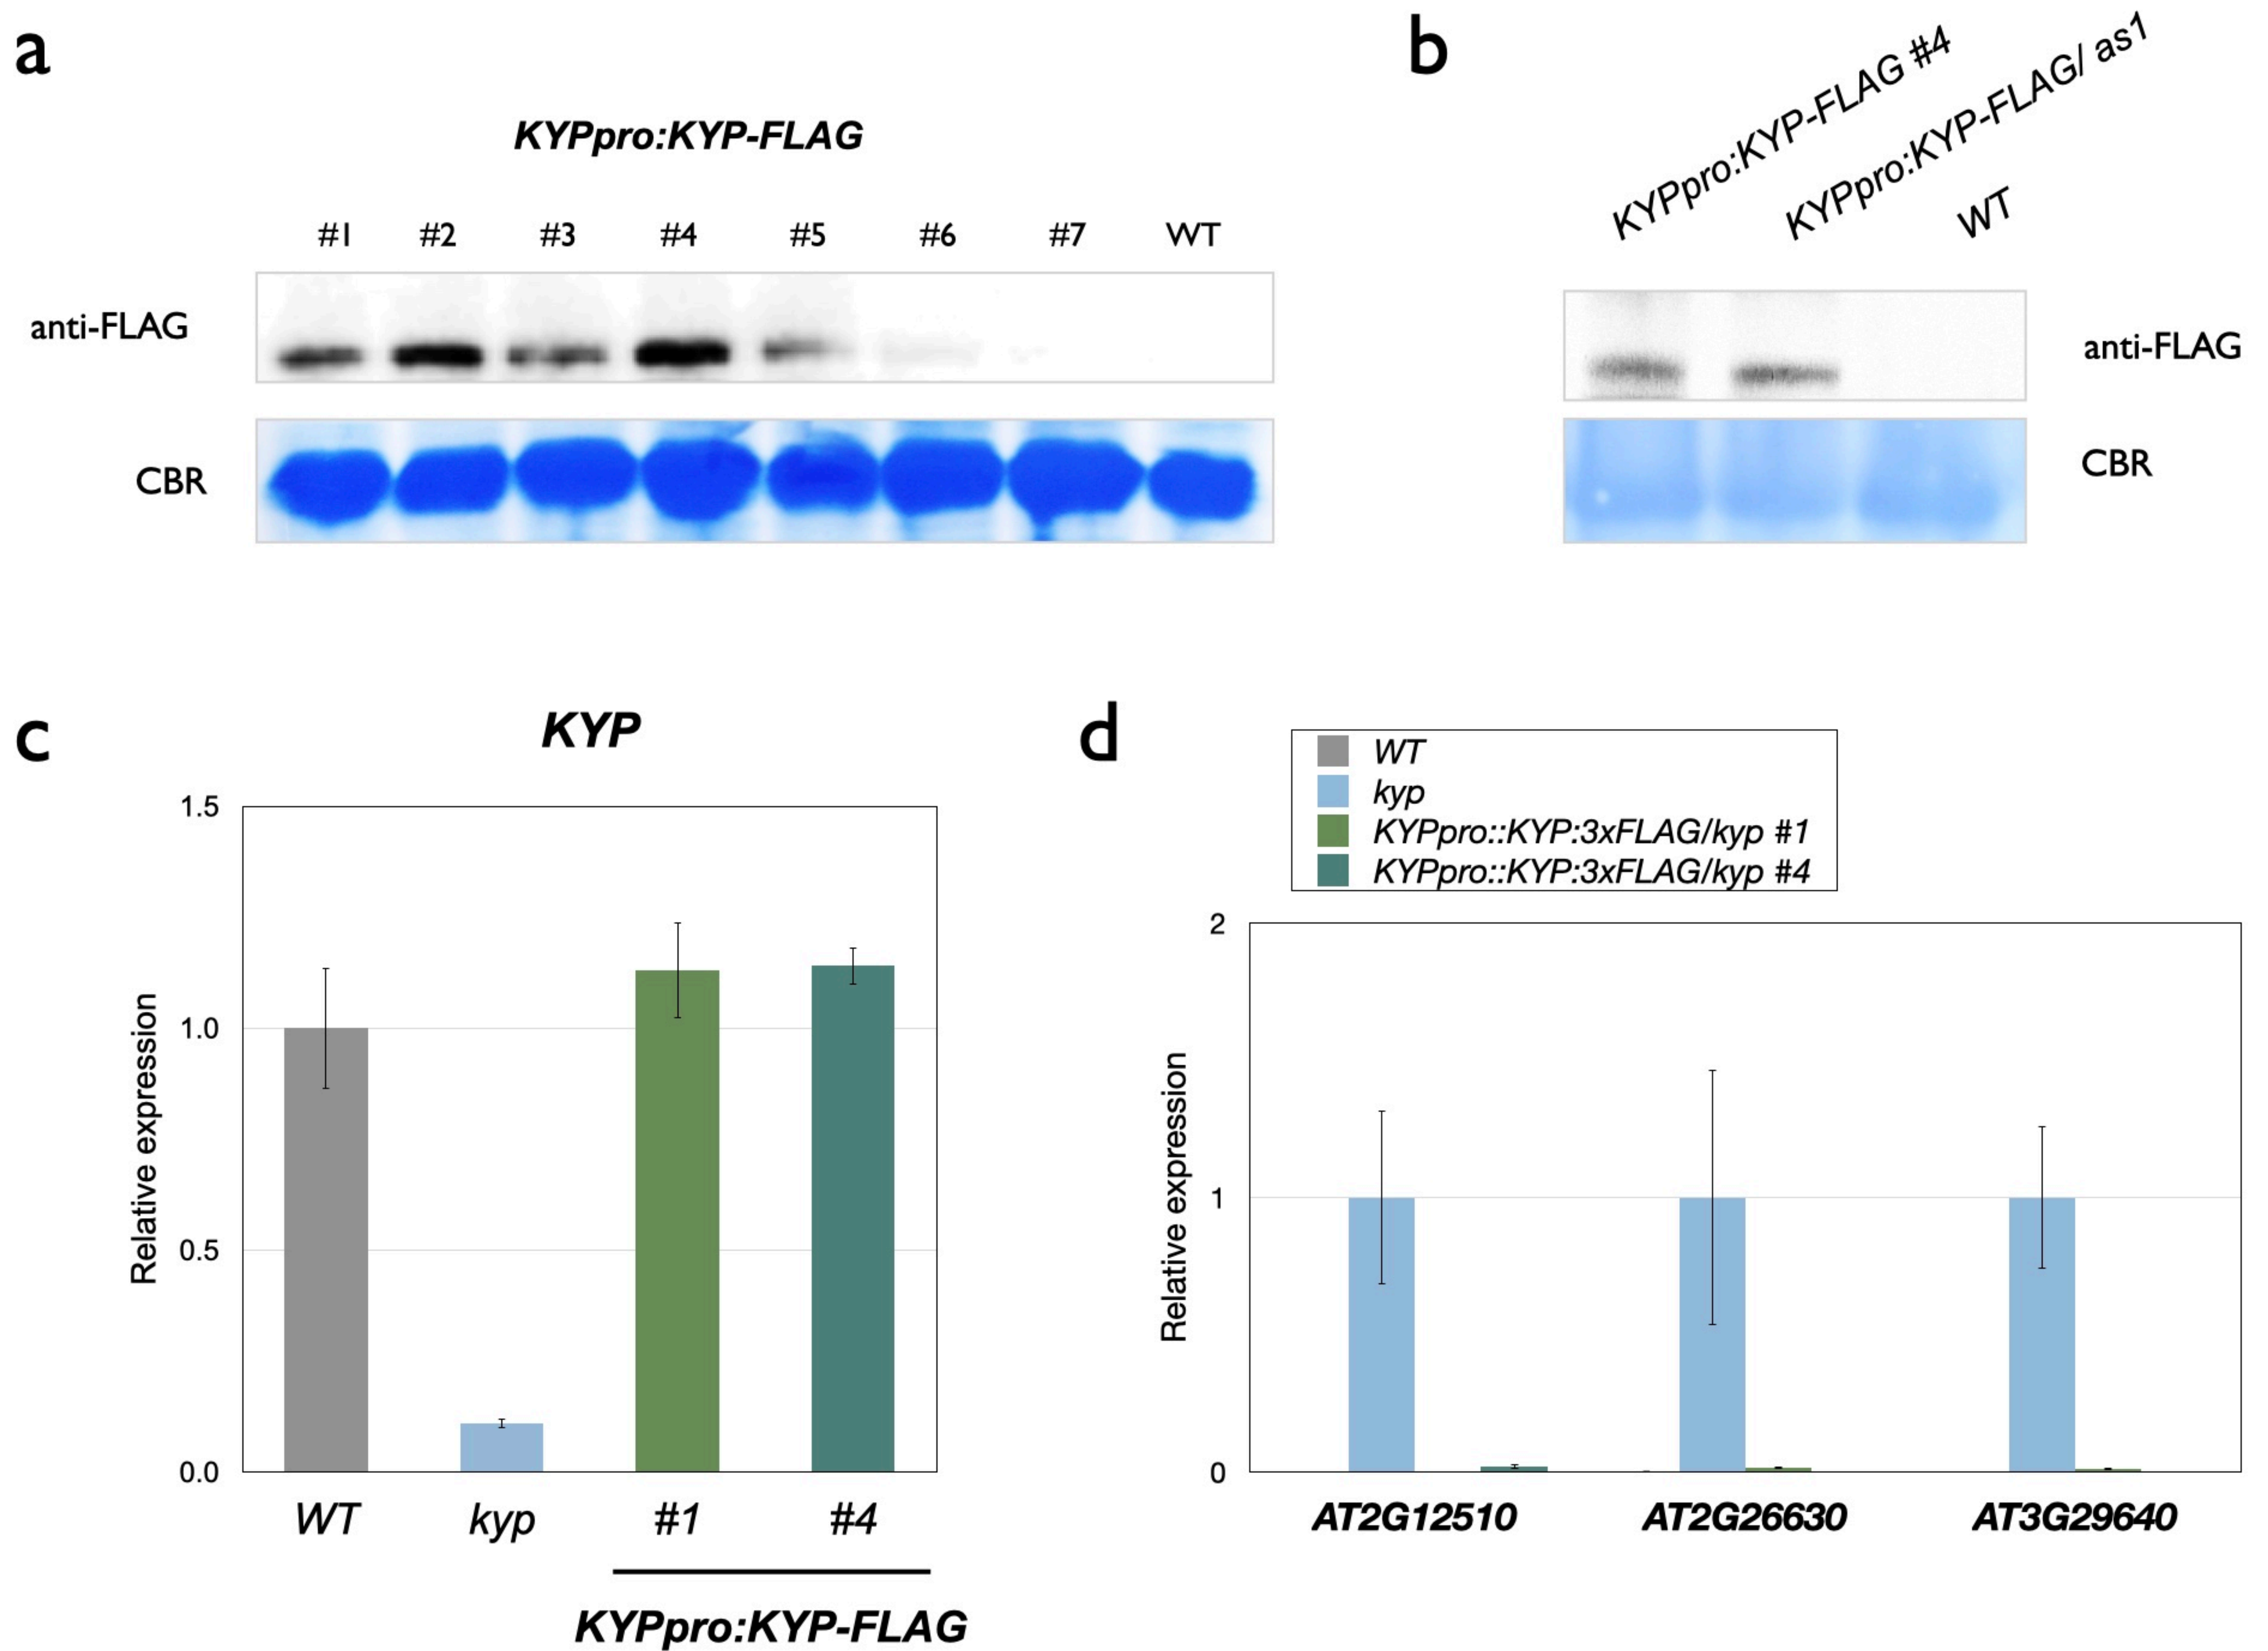

**Figure S4. The transcription and translation analysis of *KYPpro:KYP-FLAG* transgenic lines.**

(a, b) Total proteins were extracted from the *KYPpro:KYP-FLAG* transgenic lines, followed by immunoblot using an anti-FLAG antibody. CBR indicated Coomassie Brilliant Blue Staining loading control.

(c, d) Expression of *KYP* and indicated TEs was analyzed by qRT-PCR. RNA was extracted from 10-day-old plants grown under LD conditions. *UBQ10* was used as an internal control. The experiments were repeated three times with similar results. Error bars indicate  $\pm$ SD.

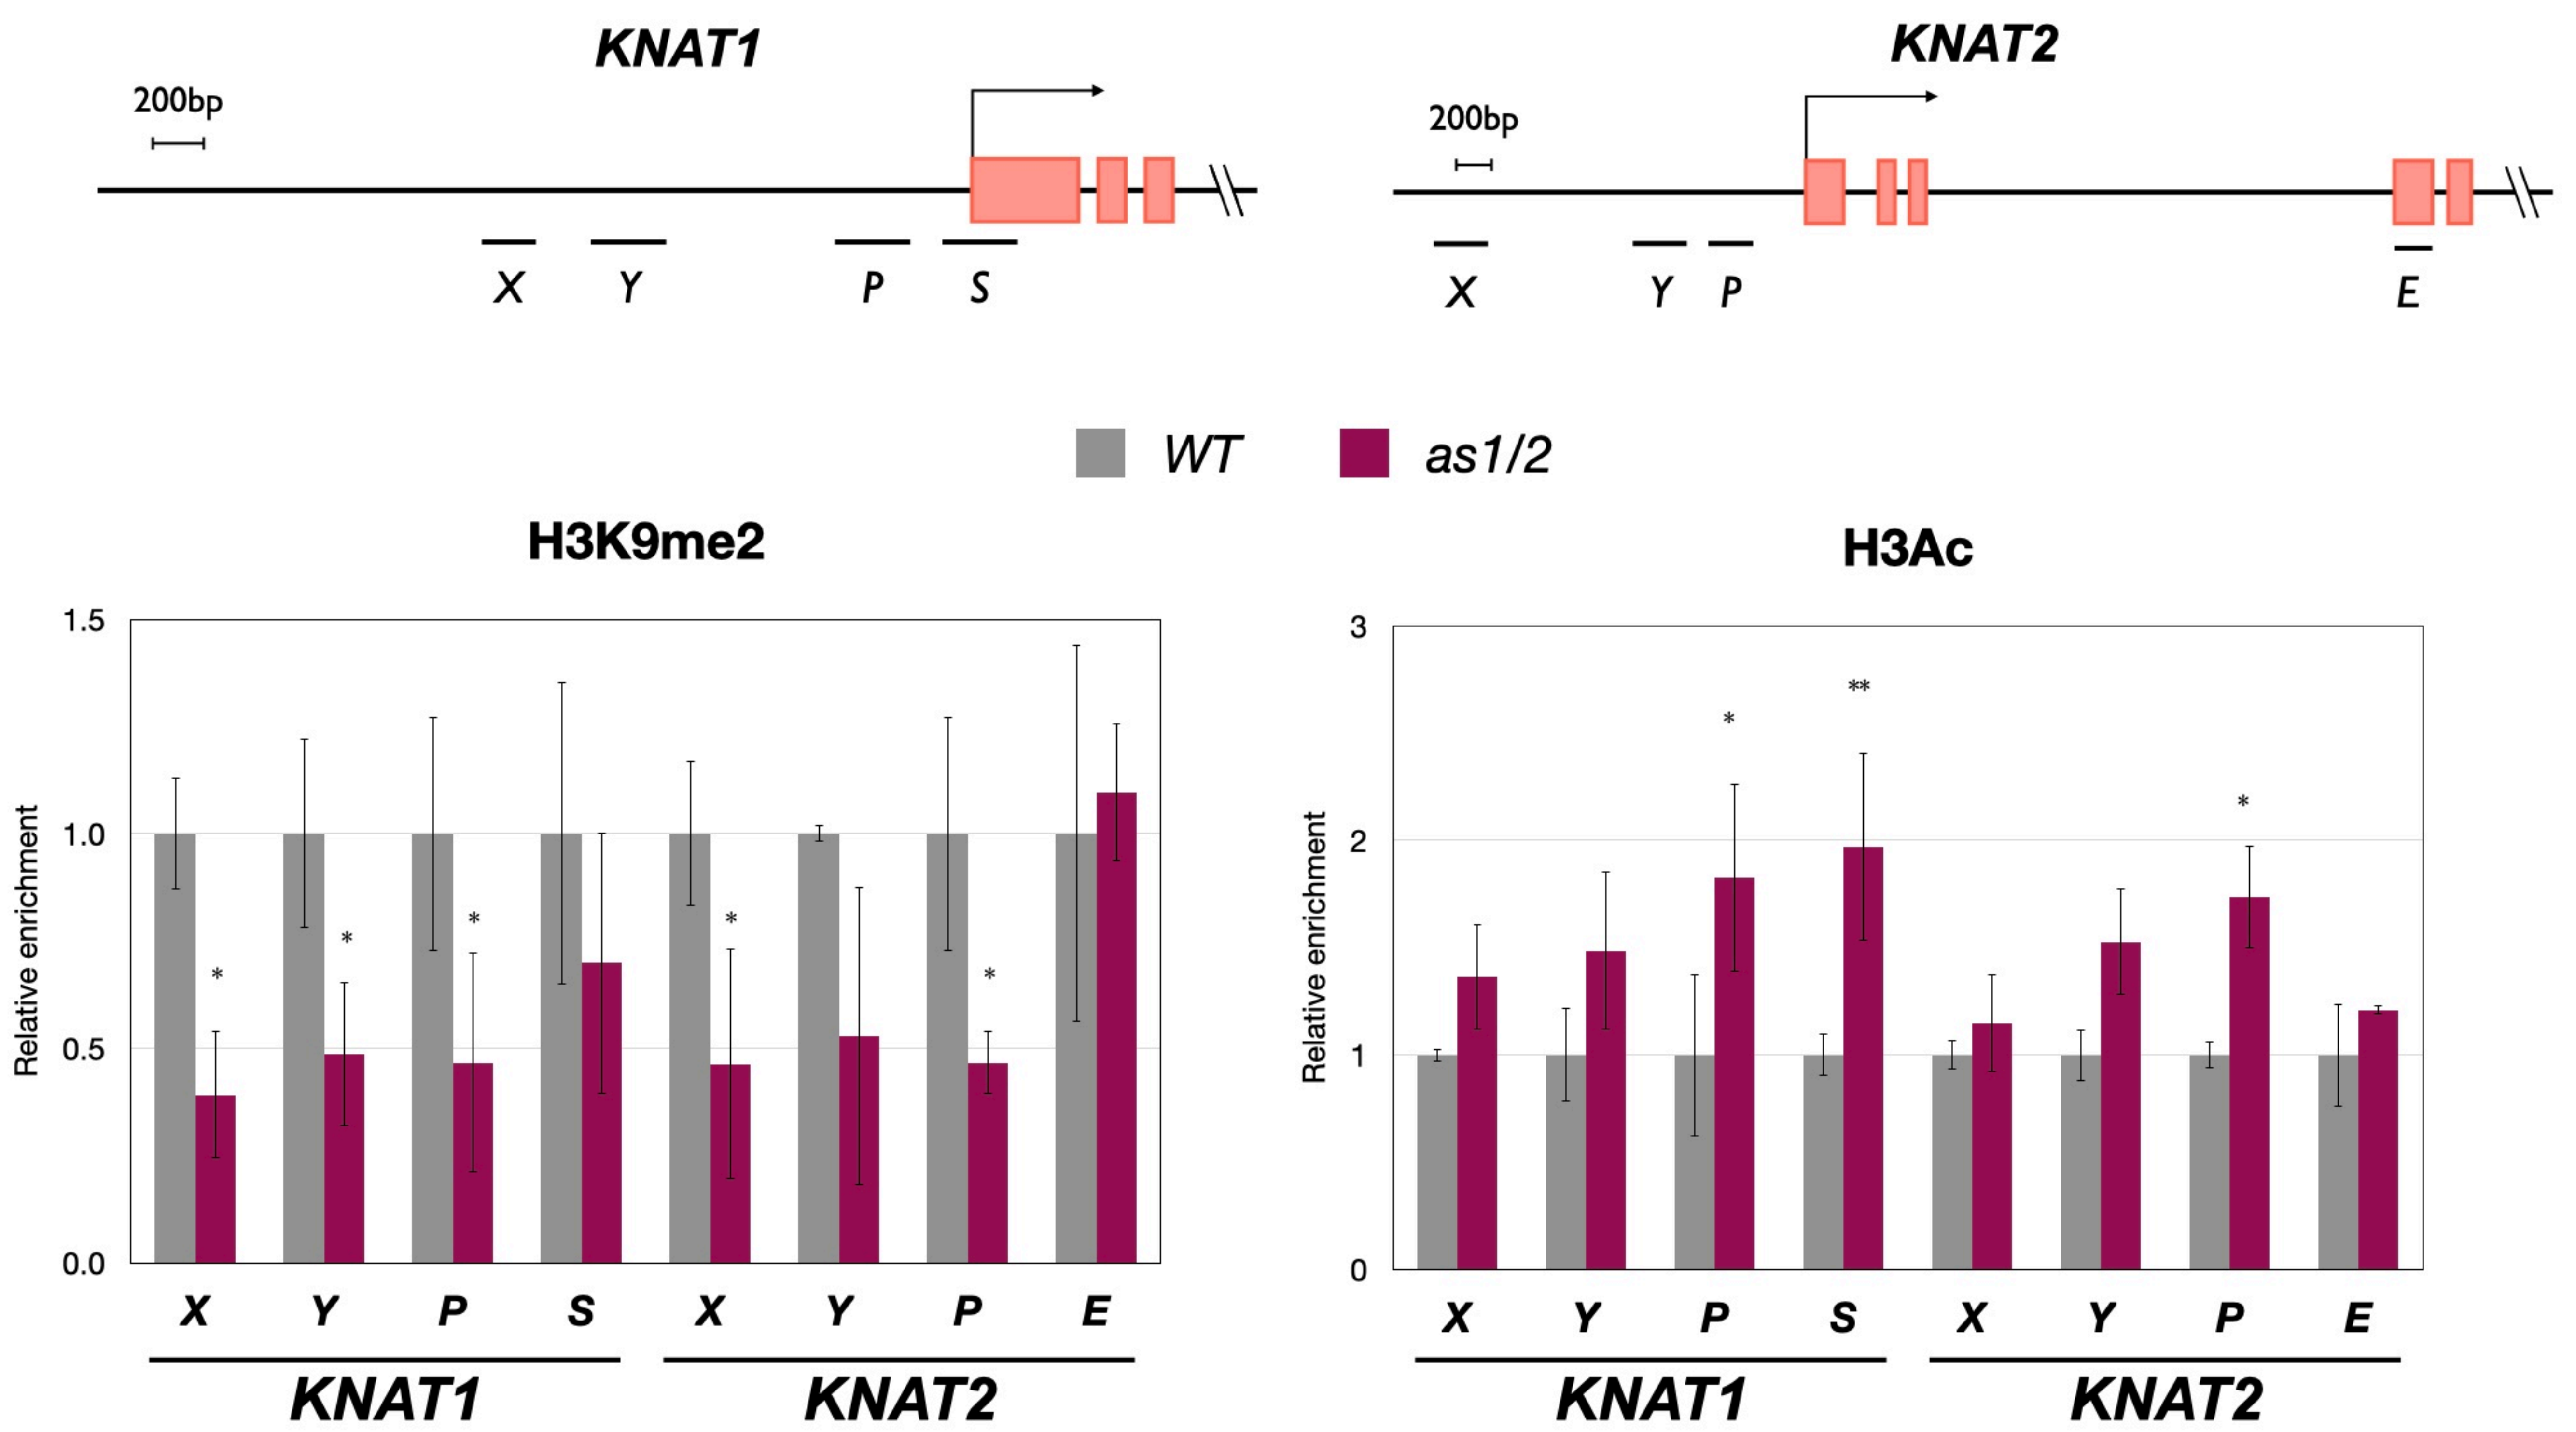

**Figure S5. The H3K9me2 and H3Ac of *KNAT1* and *KNAT2* in *as1/2*.**

ChIP analysis of H3K9me2 and H3Ac level on *KNAT1* and *KNAT2*. Plants were grown under LD for 10 days. The amounts of DNA after ChIP were quantified by qPCR and normalized to *TA3* or *TUB2*. Data points represent average of three technical replicates. Error bars correspond to standard deviations from three biological replicates. \*P < 0.05, \*\*P < 0.005 (Student's t-test).

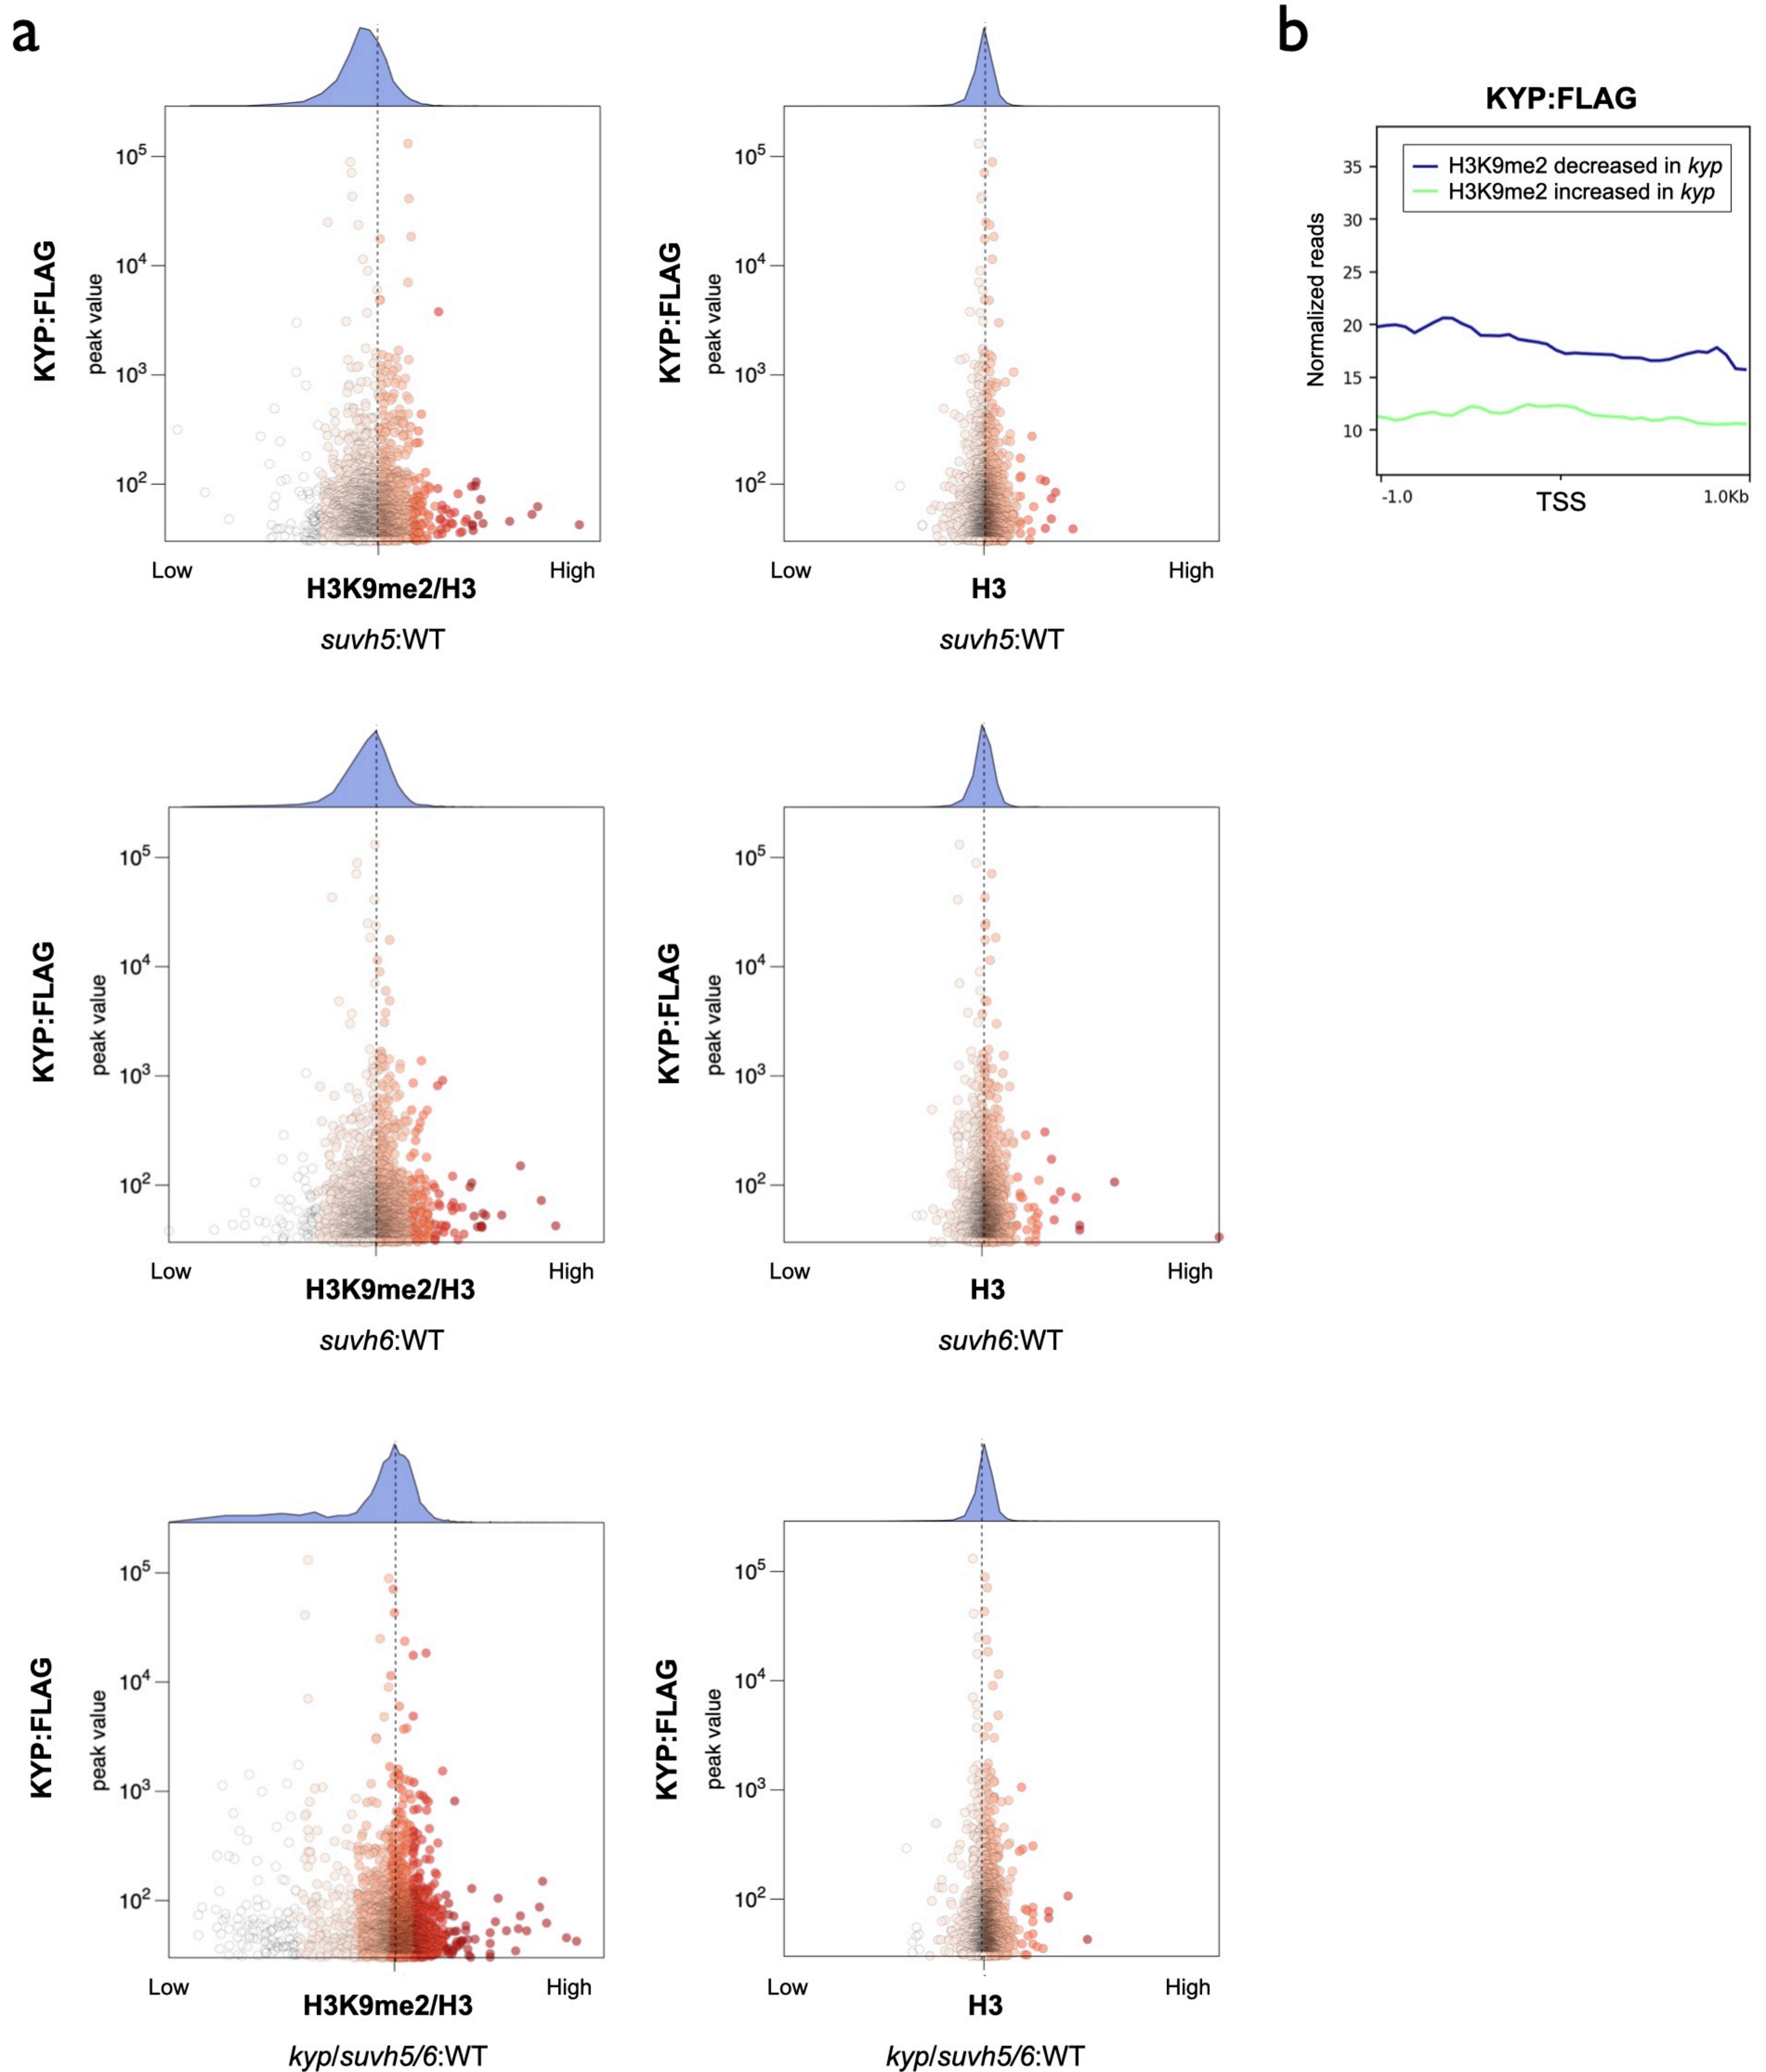

**Table S1 Primers used in this study**

| Name                 | sequence                     | note        |
|----------------------|------------------------------|-------------|
| <i>KNAT1 RTF</i>     | GGGAAGAGATGACAATATGGG        | RT-PCR      |
| <i>KNAT1 RTR</i>     | TATGGACCGAGACGATAAGG         | RT-PCR      |
| <i>KNAT2 RTF</i>     | TCATCTGACGAGGAACTGAG         | RT-PCR      |
| <i>KNAT2 RTR</i>     | CGTCCATCATATCAAACGGC         | RT-PCR      |
| <i>STM RTF</i>       | ACAGTGGTACTTAGGGAGC          | RT-PCR      |
| <i>STM RTR</i>       | TTGGGAAAGGATTGCCCAAG         | RT-PCR      |
| <i>KNAT3 RTF</i>     | CATTTCCAAGAAGCACCGCC         | RT-PCR      |
| <i>KNAT3 RTR</i>     | CTTGCGGTTGTGGTGTAGC          | RT-PCR      |
| <i>KNAT5 RTF</i>     | CTACCACCCTTACCACTGCG         | RT-PCR      |
| <i>KNAT5 RTR</i>     | TATCGTTTTACCATCGGCGT         | RT-PCR      |
| <i>KNAT6 RTF</i>     | ATCTgACgAggAACTgAgTg         | RT-PCR      |
| <i>KNAT6 RTR</i>     | CTCTgATggCTTCCAATgAC         | RT-PCR      |
| <i>NUC1 RTF</i>      | GACGTGATTGCTGCTGTCCA         | RT-PCR      |
| <i>NUC1 RTR</i>      | GCCTTCTTGGCTGGGACTTT         | RT-PCR      |
| <i>PAP15 RTF</i>     | TCTTCTGCTTTCTCTCGCCG         | RT-PCR      |
| <i>PAP15 RTR</i>     | TTGACGGAATAGAGTGGGCG         | RT-PCR      |
| <i>GRF4 RTF</i>      | CTATCCCAAAGCAACCAACAC        | RT-PCR      |
| <i>GRF4 RTR</i>      | GCAGCAGAGCCTTGTTCTTC         | RT-PCR      |
| <i>CDKC2 RTF</i>     | GAGGAGCCTCCACCGATTTG         | RT-PCR      |
| <i>CDKC2 RTR</i>     | GCGGTTATCGGAAACCCTTCT        | RT-PCR      |
| <i>MLP328 RTF</i>    | AAGGAAGAGAGATGGCGACG         | RT-PCR/ChIP |
| <i>MLP328 RTR</i>    | CCTCCACCGCTTGTAGTGTT         | RT-PCR/ChIP |
| <i>ERF96 RTF</i>     | GAACGTGTGTGGCTTGGAAC         | RT-PCR      |
| <i>ERF96 RTR</i>     | ATTGCTGCTTGGCCTCTCAT         | RT-PCR      |
| <i>AT2G12510 RTF</i> | CGTCCCATCAACCTACCACC         | RT-PCR      |
| <i>AT2G12510 RTR</i> | CGTACACGACTGCTATCCCC         | RT-PCR      |
| <i>AT2G14190 RTF</i> | TTCCAAGTCCAAGAGGGGGA         | RT-PCR/ChIP |
| <i>AT2G14190 RTR</i> | GGTTGGTTCTGTTGCTGCTG         | RT-PCR/ChIP |
| <i>AT3G29640 RTF</i> | TTGTTCTCGTCAGGGCATGG         | RT-PCR      |
| <i>AT3G29640 RTR</i> | TGACCTTTGACCACCTTTGC         | RT-PCR      |
| <i>UBQ10 RTF</i>     | GATCTTTGCCGAAAACAATTGGAGGAT  | RT-PCR      |
| <i>UBQ10 RTR</i>     | CGACTTGTGATTAGAAAGAAAGAGATAA | RT-PCR      |
| <i>KNAT1 X_F</i>     | TACACGAACACAGATGAT           | ChIP        |
| <i>KNAT1 X_R</i>     | CAGTGAAGTGAGAGTAGG           | ChIP        |
| <i>KNAT1 Y2_F</i>    | ACTGAAACAGAAAATAAGAGGAGGT    | ChIP        |
| <i>KNAT1 Y2_R</i>    | TTGCATTGAAATGTTTTCTTTTCC     | ChIP        |
| <i>KNAT1 P_F</i>     | AACCATAGCCTGAAGTAGCC         | ChIP        |
| <i>KNAT1 P_R</i>     | AAGACGTCGTTTGCTTTGGG         | ChIP        |
| <i>KNAT1 S_F</i>     | CTCTTCATCTTACACCCATCC        | ChIP        |
| <i>KNAT1 S_R</i>     | CCAGGACCATAATTGCTAC          | ChIP        |
| <i>KNAT2 X2_F</i>    | CGTCGTCAAATGCGCCATAC         | ChIP        |
| <i>KNAT2 X2_R</i>    | TAAGGGCAAGGGAATTGGGC         | ChIP        |
| <i>KNAT2 Y_F</i>     | CTGTCGTTTTTATAAGGTTTG        | ChIP        |
| <i>KNAT2 Y_R</i>     | CACTTATCGCACTTCTTGTTA        | ChIP        |
| <i>KNAT2 P_F</i>     | AACCGATCCGGTTAGACAAC         | ChIP        |
| <i>KNAT2 P_R</i>     | CTGTACGATTACATGGTTACG        | ChIP        |
| <i>KNAT2 E_F</i>     | CAAAGAAGCAATGACCGCGA         | ChIP        |
| <i>KNAT2 E_R</i>     | ACACATTGAGAGGCGGATATT        | ChIP        |
| <i>KNAT3_P1F</i>     | TGGATGGATGCAGTGTGGAC         | ChIP        |
| <i>KNAT3_P1R</i>     | GAAGAAAACCGCAACGGACC         | ChIP        |
| <i>KNAT5_P1F</i>     | CTCTCCCGTCACATTCTGGT         | ChIP        |
| <i>KNAT5_P1R</i>     | GGAGGGAGGGAGGGAGTAAA         | ChIP        |
| <i>NUC1 P1F</i>      | GCGCTACTTCTCCGCTTTGA         | ChIP        |
| <i>NUC1 P1R</i>      | TTGTGTCAAGTGGCAACGGT         | ChIP        |
| <i>PAP15 P1F</i>     | CTTTTTGACTCTTCTATTTCAGTCA    | ChIP        |
| <i>PAP15 P1R</i>     | ACACTCATTTGTGATCTTTAACG      | ChIP        |
| <i>GRF4 P1F</i>      | GTGCCCTCGTCGGAAACTAA         | ChIP        |
| <i>GRF4 P1R</i>      | GGCCCAAACCTCCACCTAC          | ChIP        |
| <i>CDKC2 P1F</i>     | TCGGTTGAATAATGGCGGCT         | ChIP        |
| <i>CDKC2 P1R</i>     | ACCCGTAAGTTCCTTACCA          | ChIP        |
| <i>ERF96 P1F</i>     | ACTCACTCTCACACACACTC         | ChIP        |
| <i>ERF96 P1R</i>     | ACAGAATGCCGTTTCTCATGC        | ChIP        |
| <i>AT2G14190 P1F</i> | GAGAAGGCAGCGGAGGATTC         | ChIP        |
| <i>AT2G14190 P1R</i> | CGACGTGAAGCAAATCTGTCA        | ChIP        |
| <i>AT3G29640 P1F</i> | GAGCCGGACTTTTGATCCGA         | ChIP        |
| <i>AT3G29640 P1R</i> | TCATGCCCAACAACCTGCTCA        | ChIP        |
| <i>TA3-F</i>         | CTGCGTGGAAGTCTGTCAA          | ChIP        |
| <i>TA3-R</i>         | CTATGCCACAGGGCAGTTTT         | ChIP        |
| <i>Actin RT1</i>     | AATGGAAGCTCCTGGAATCC         | ChIP        |
| <i>Actin RT2</i>     | ATCGATGGACCTGACTCATC         | ChIP        |
| <i>TUB2-F</i>        | ACAAACACAGAGAGGAGTGAGCA      | ChIP        |
| <i>TUB2-R</i>        | ACGCATCTTCGGTTGGATGAGTGA     | ChIP        |

Figure 2d

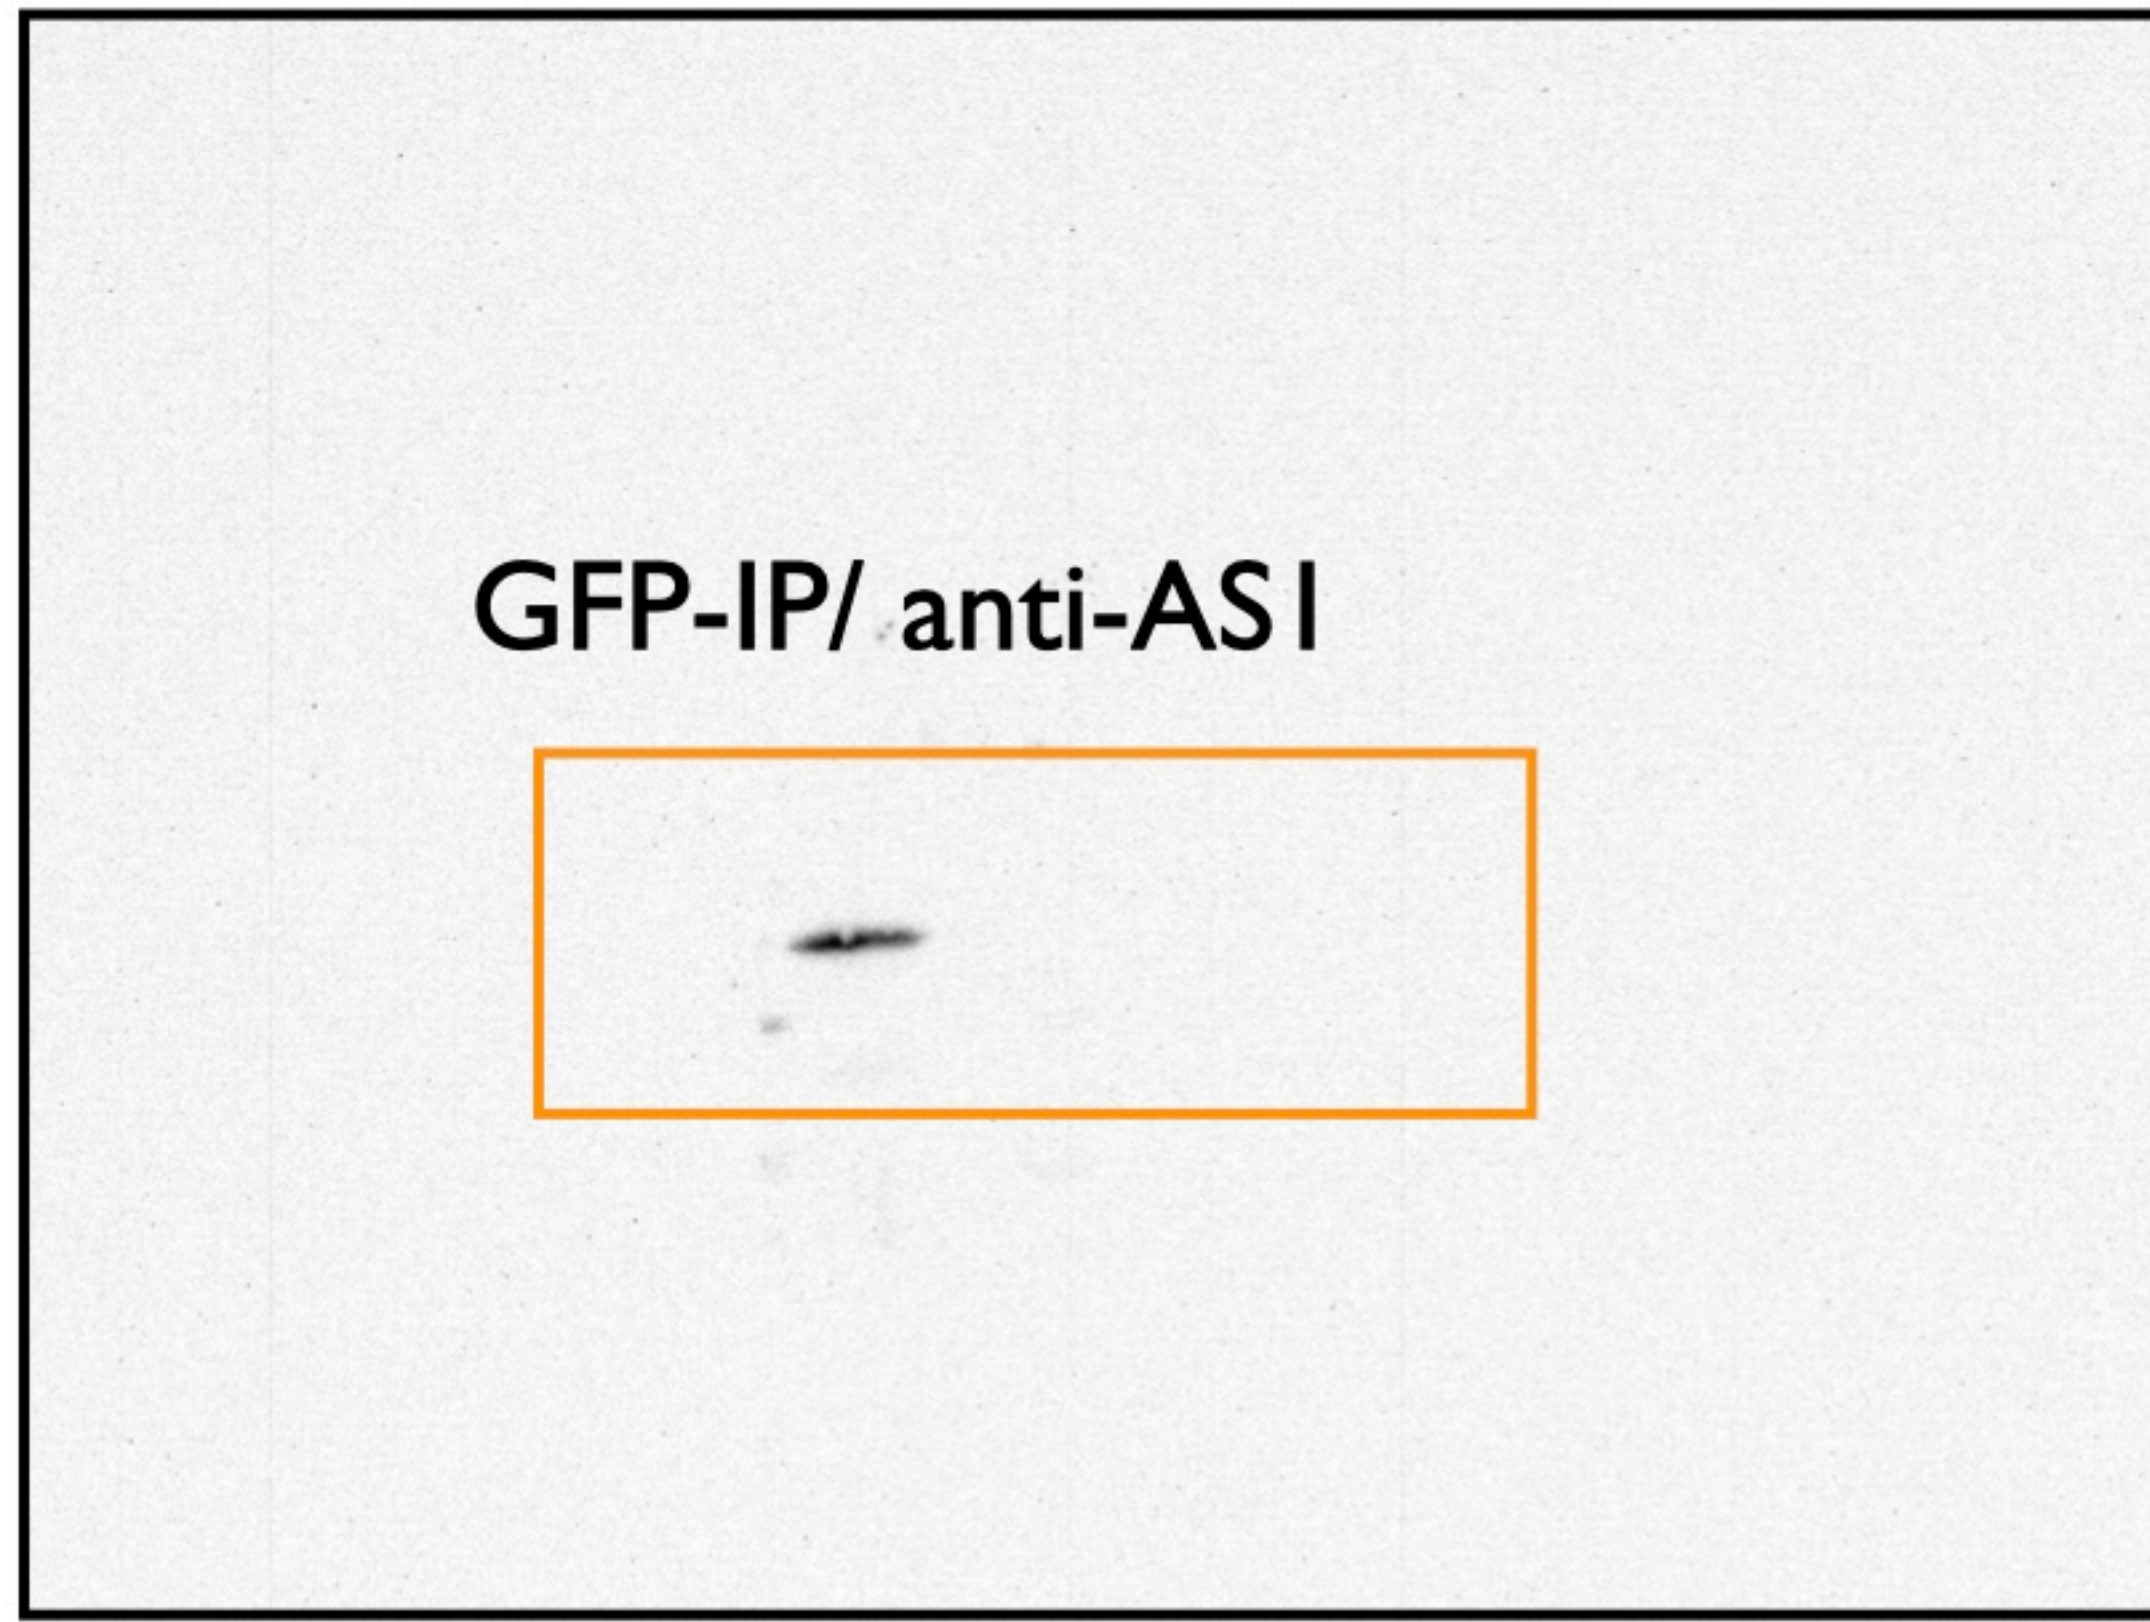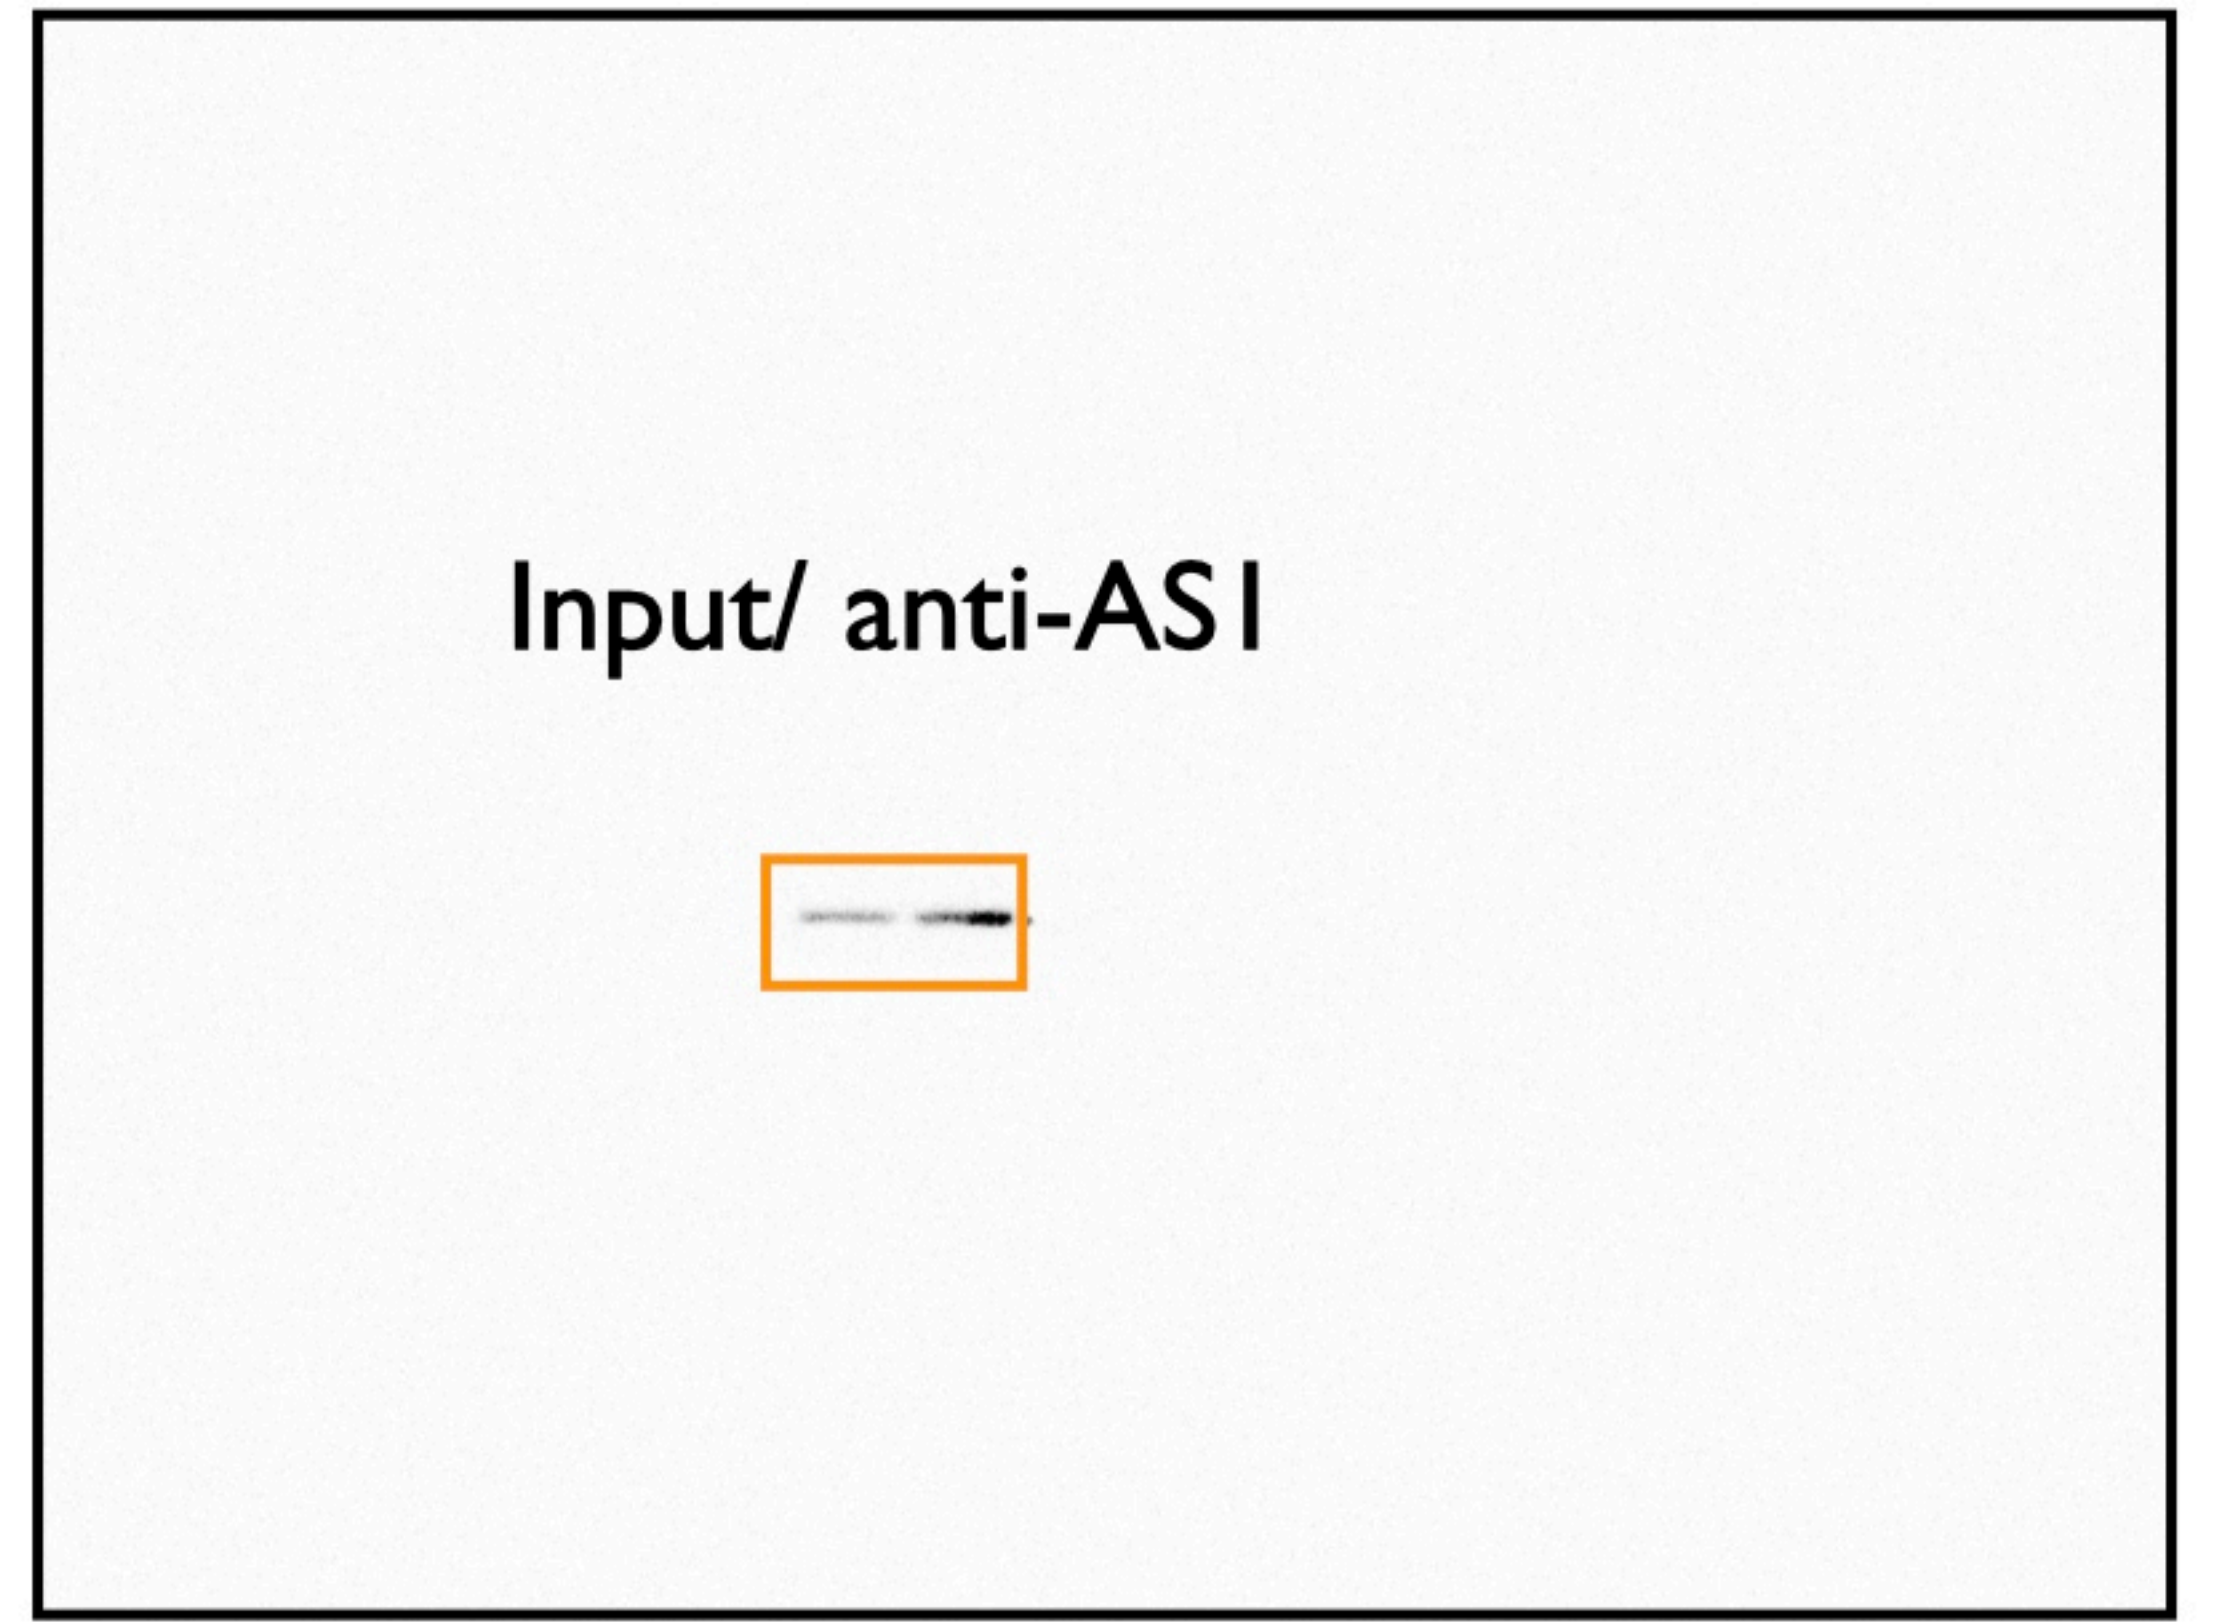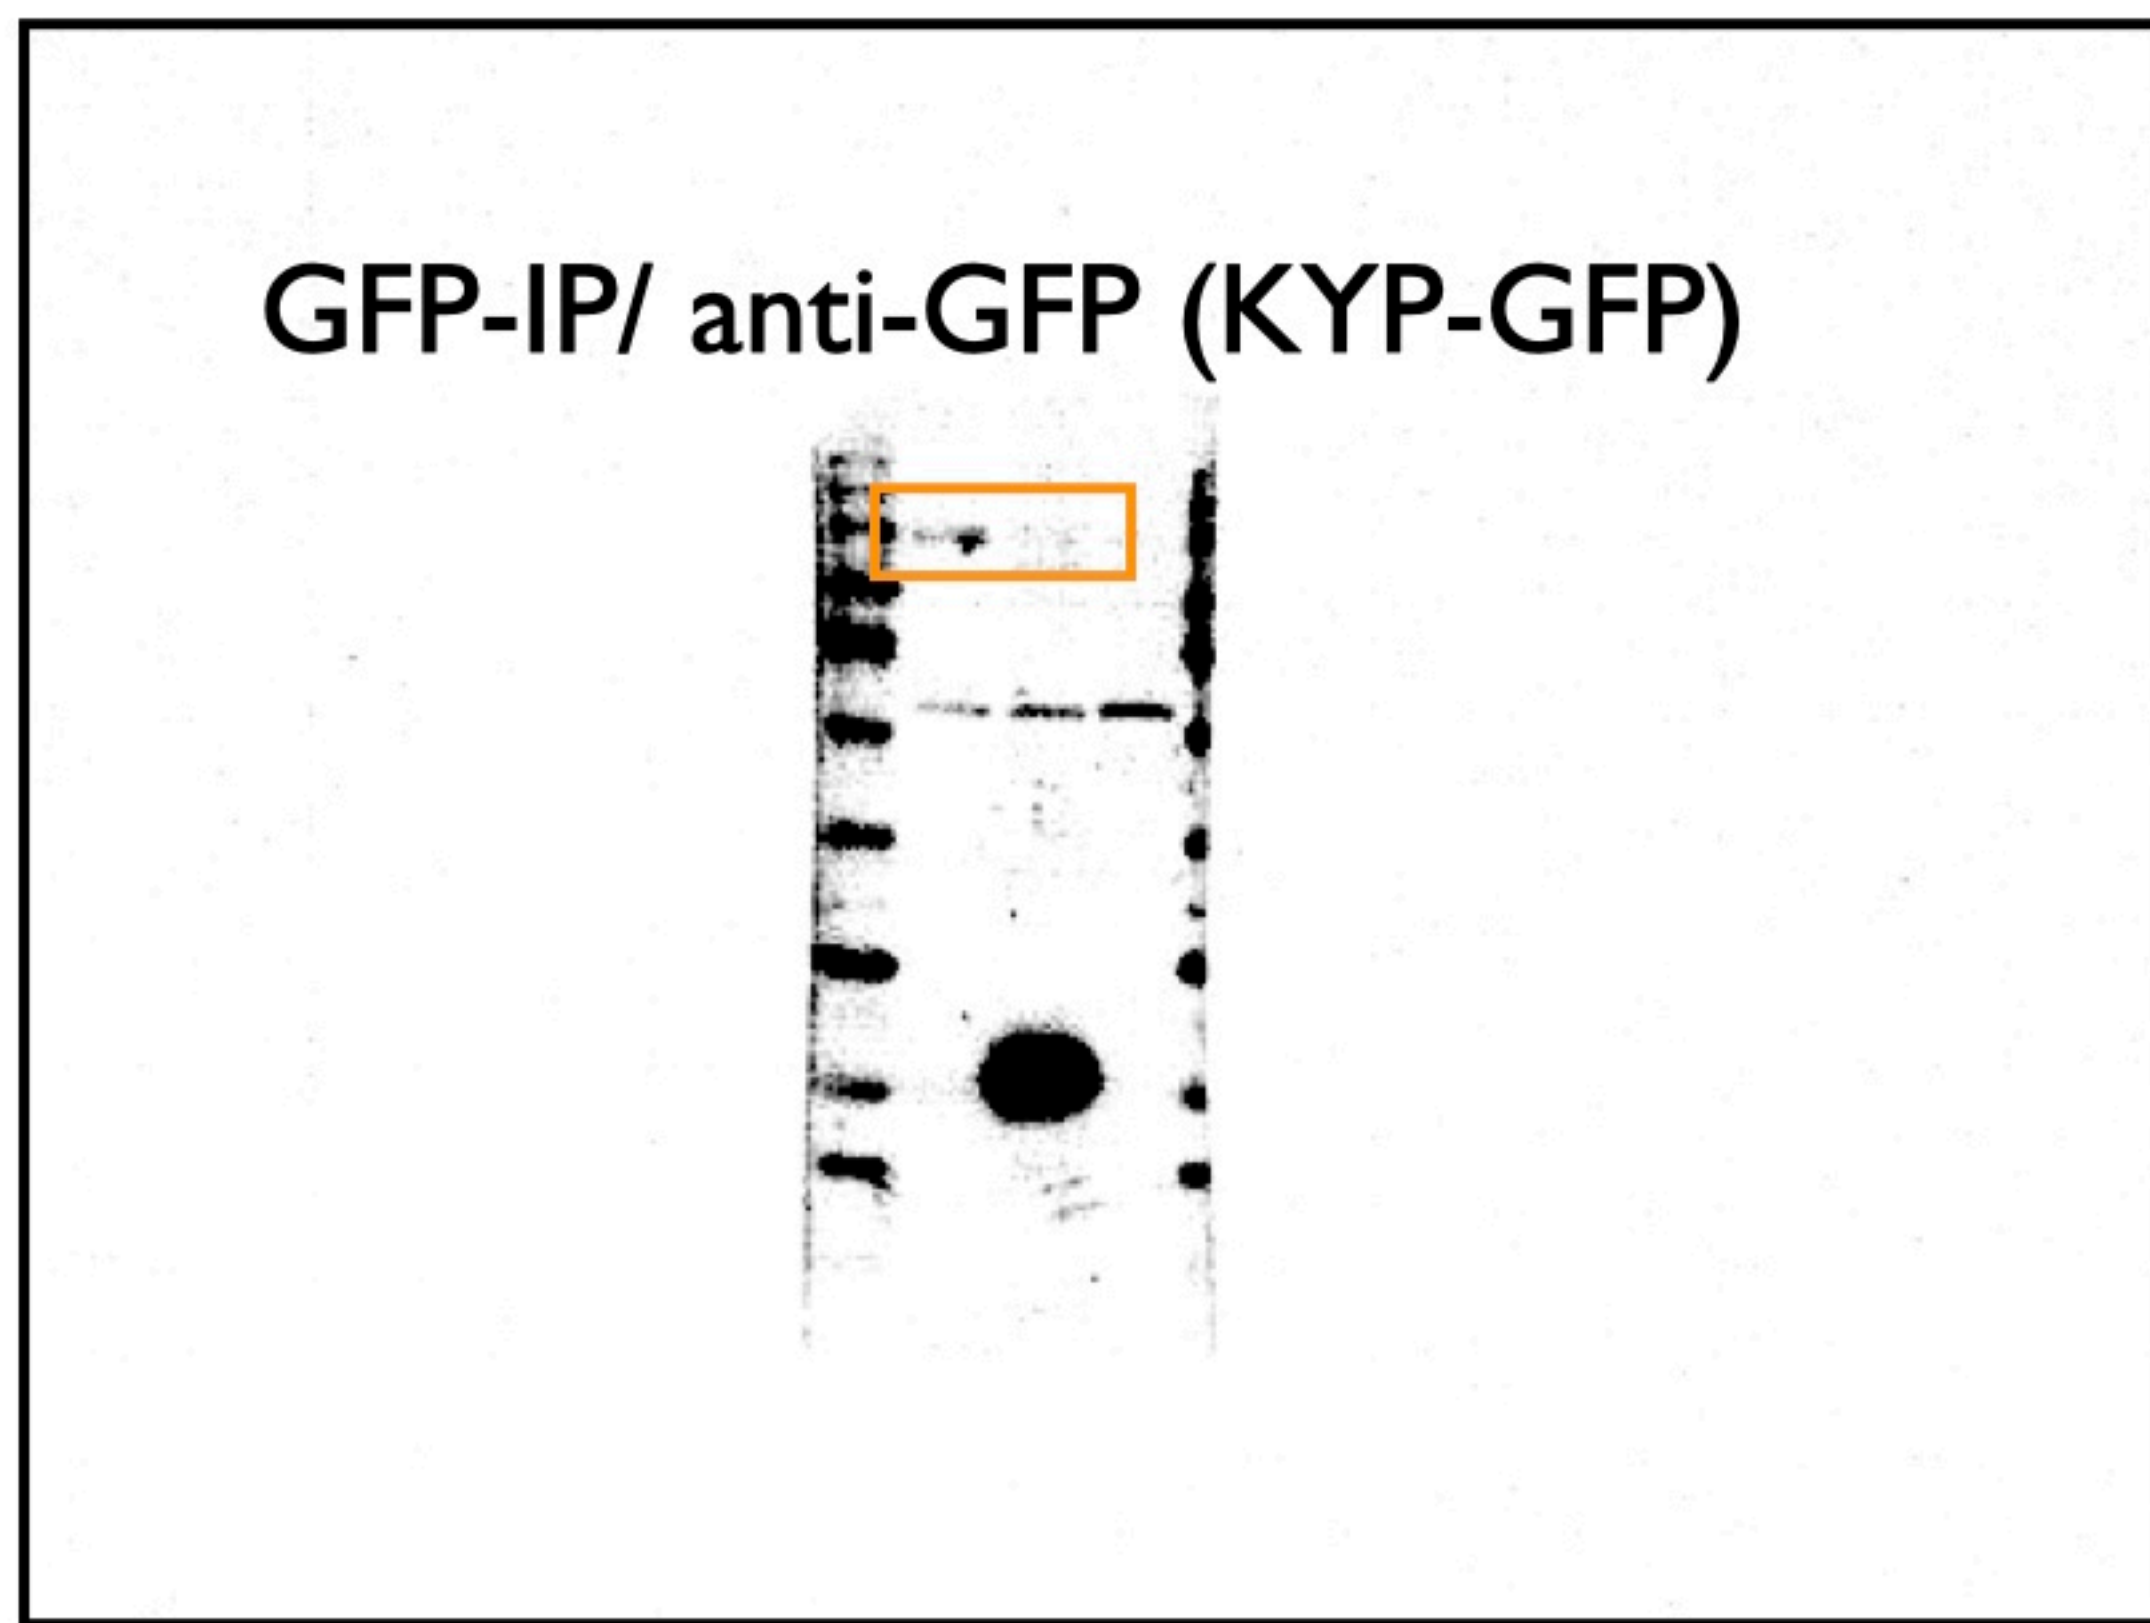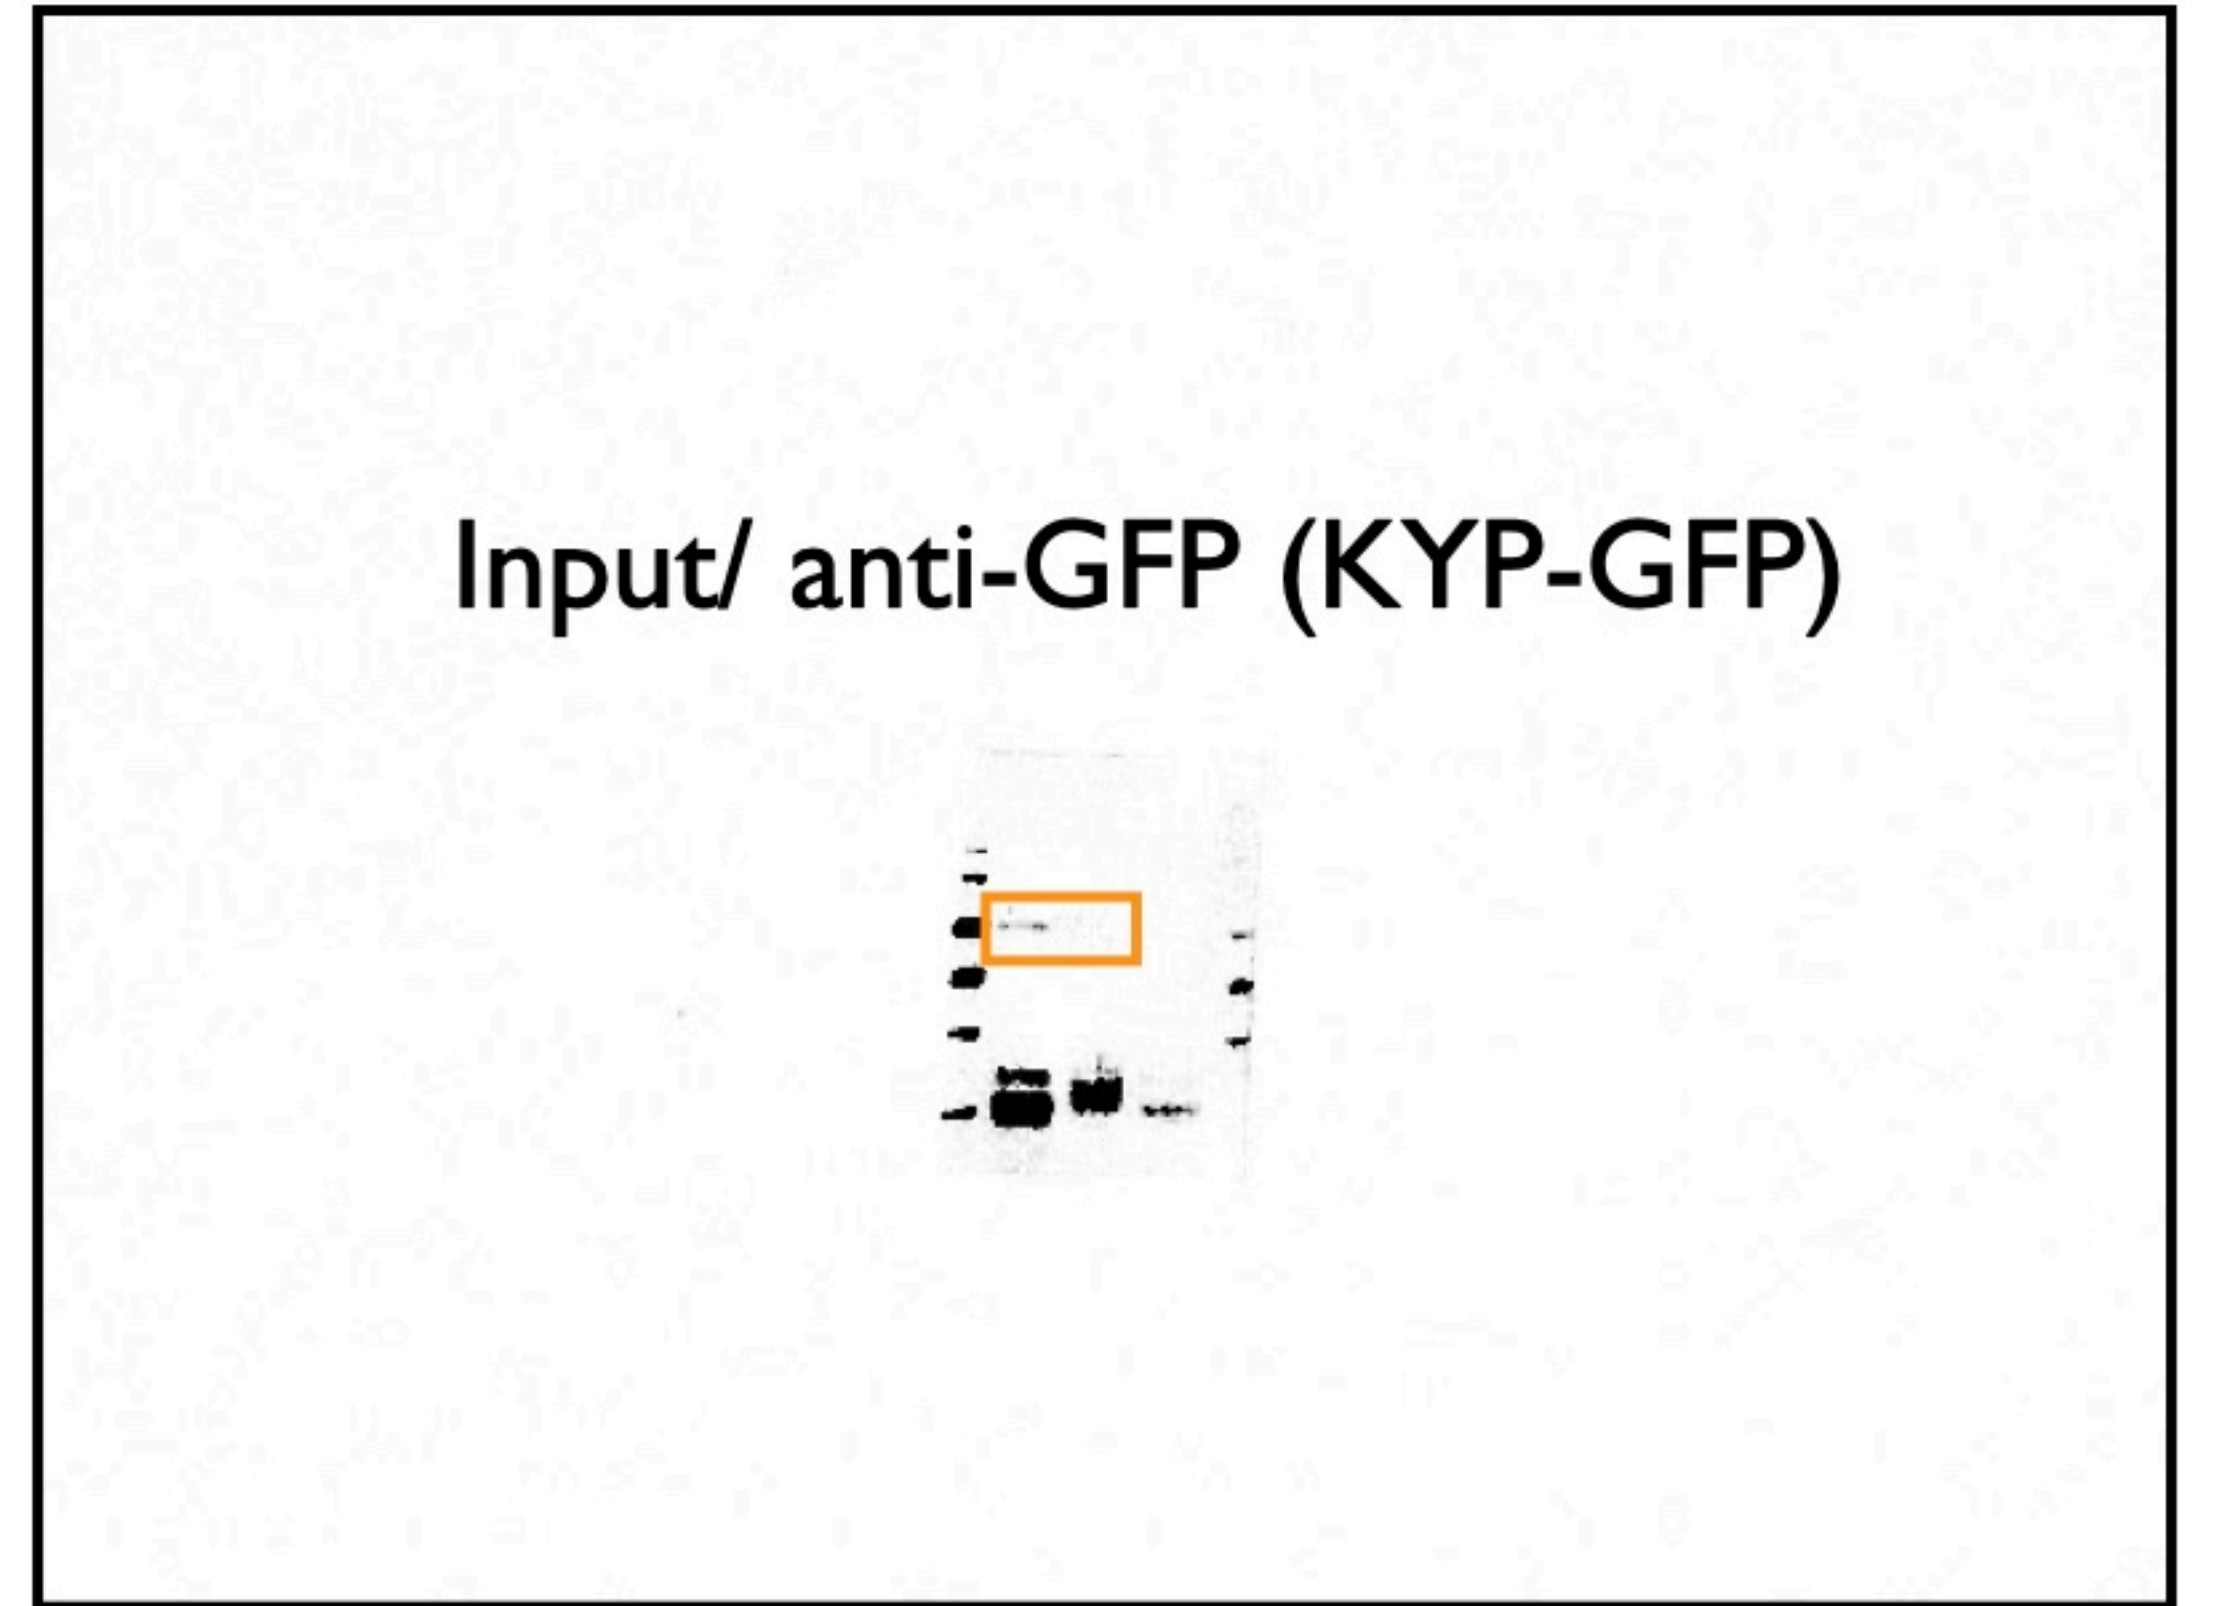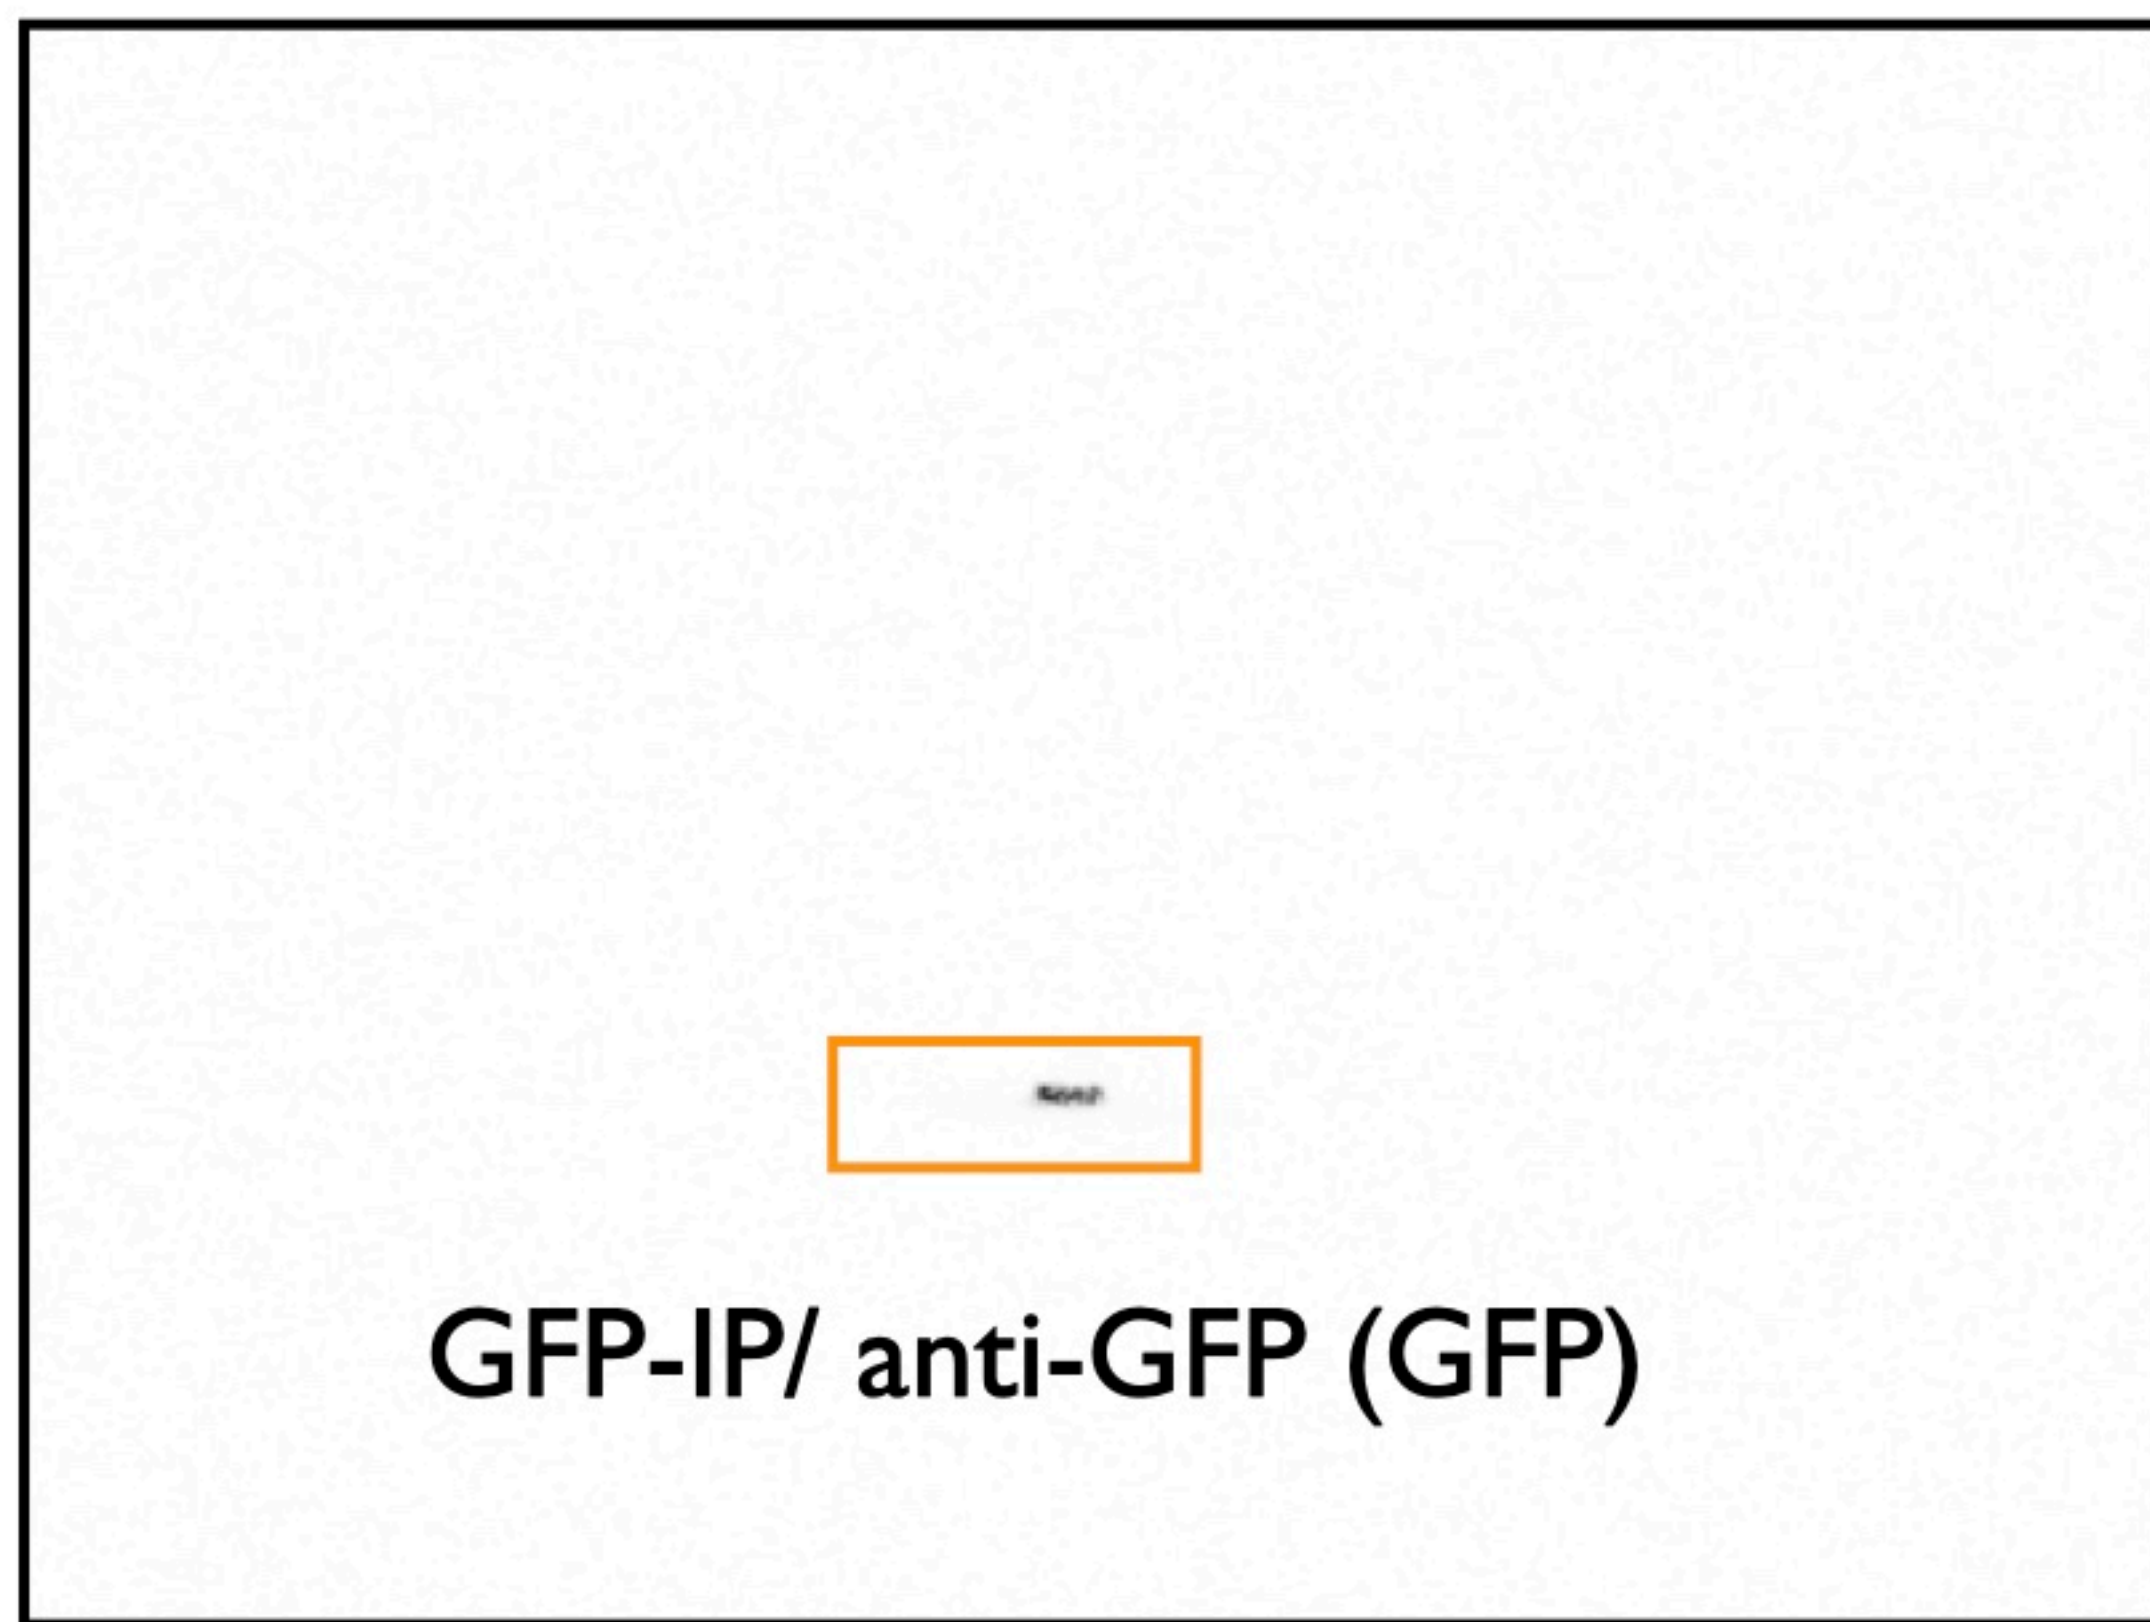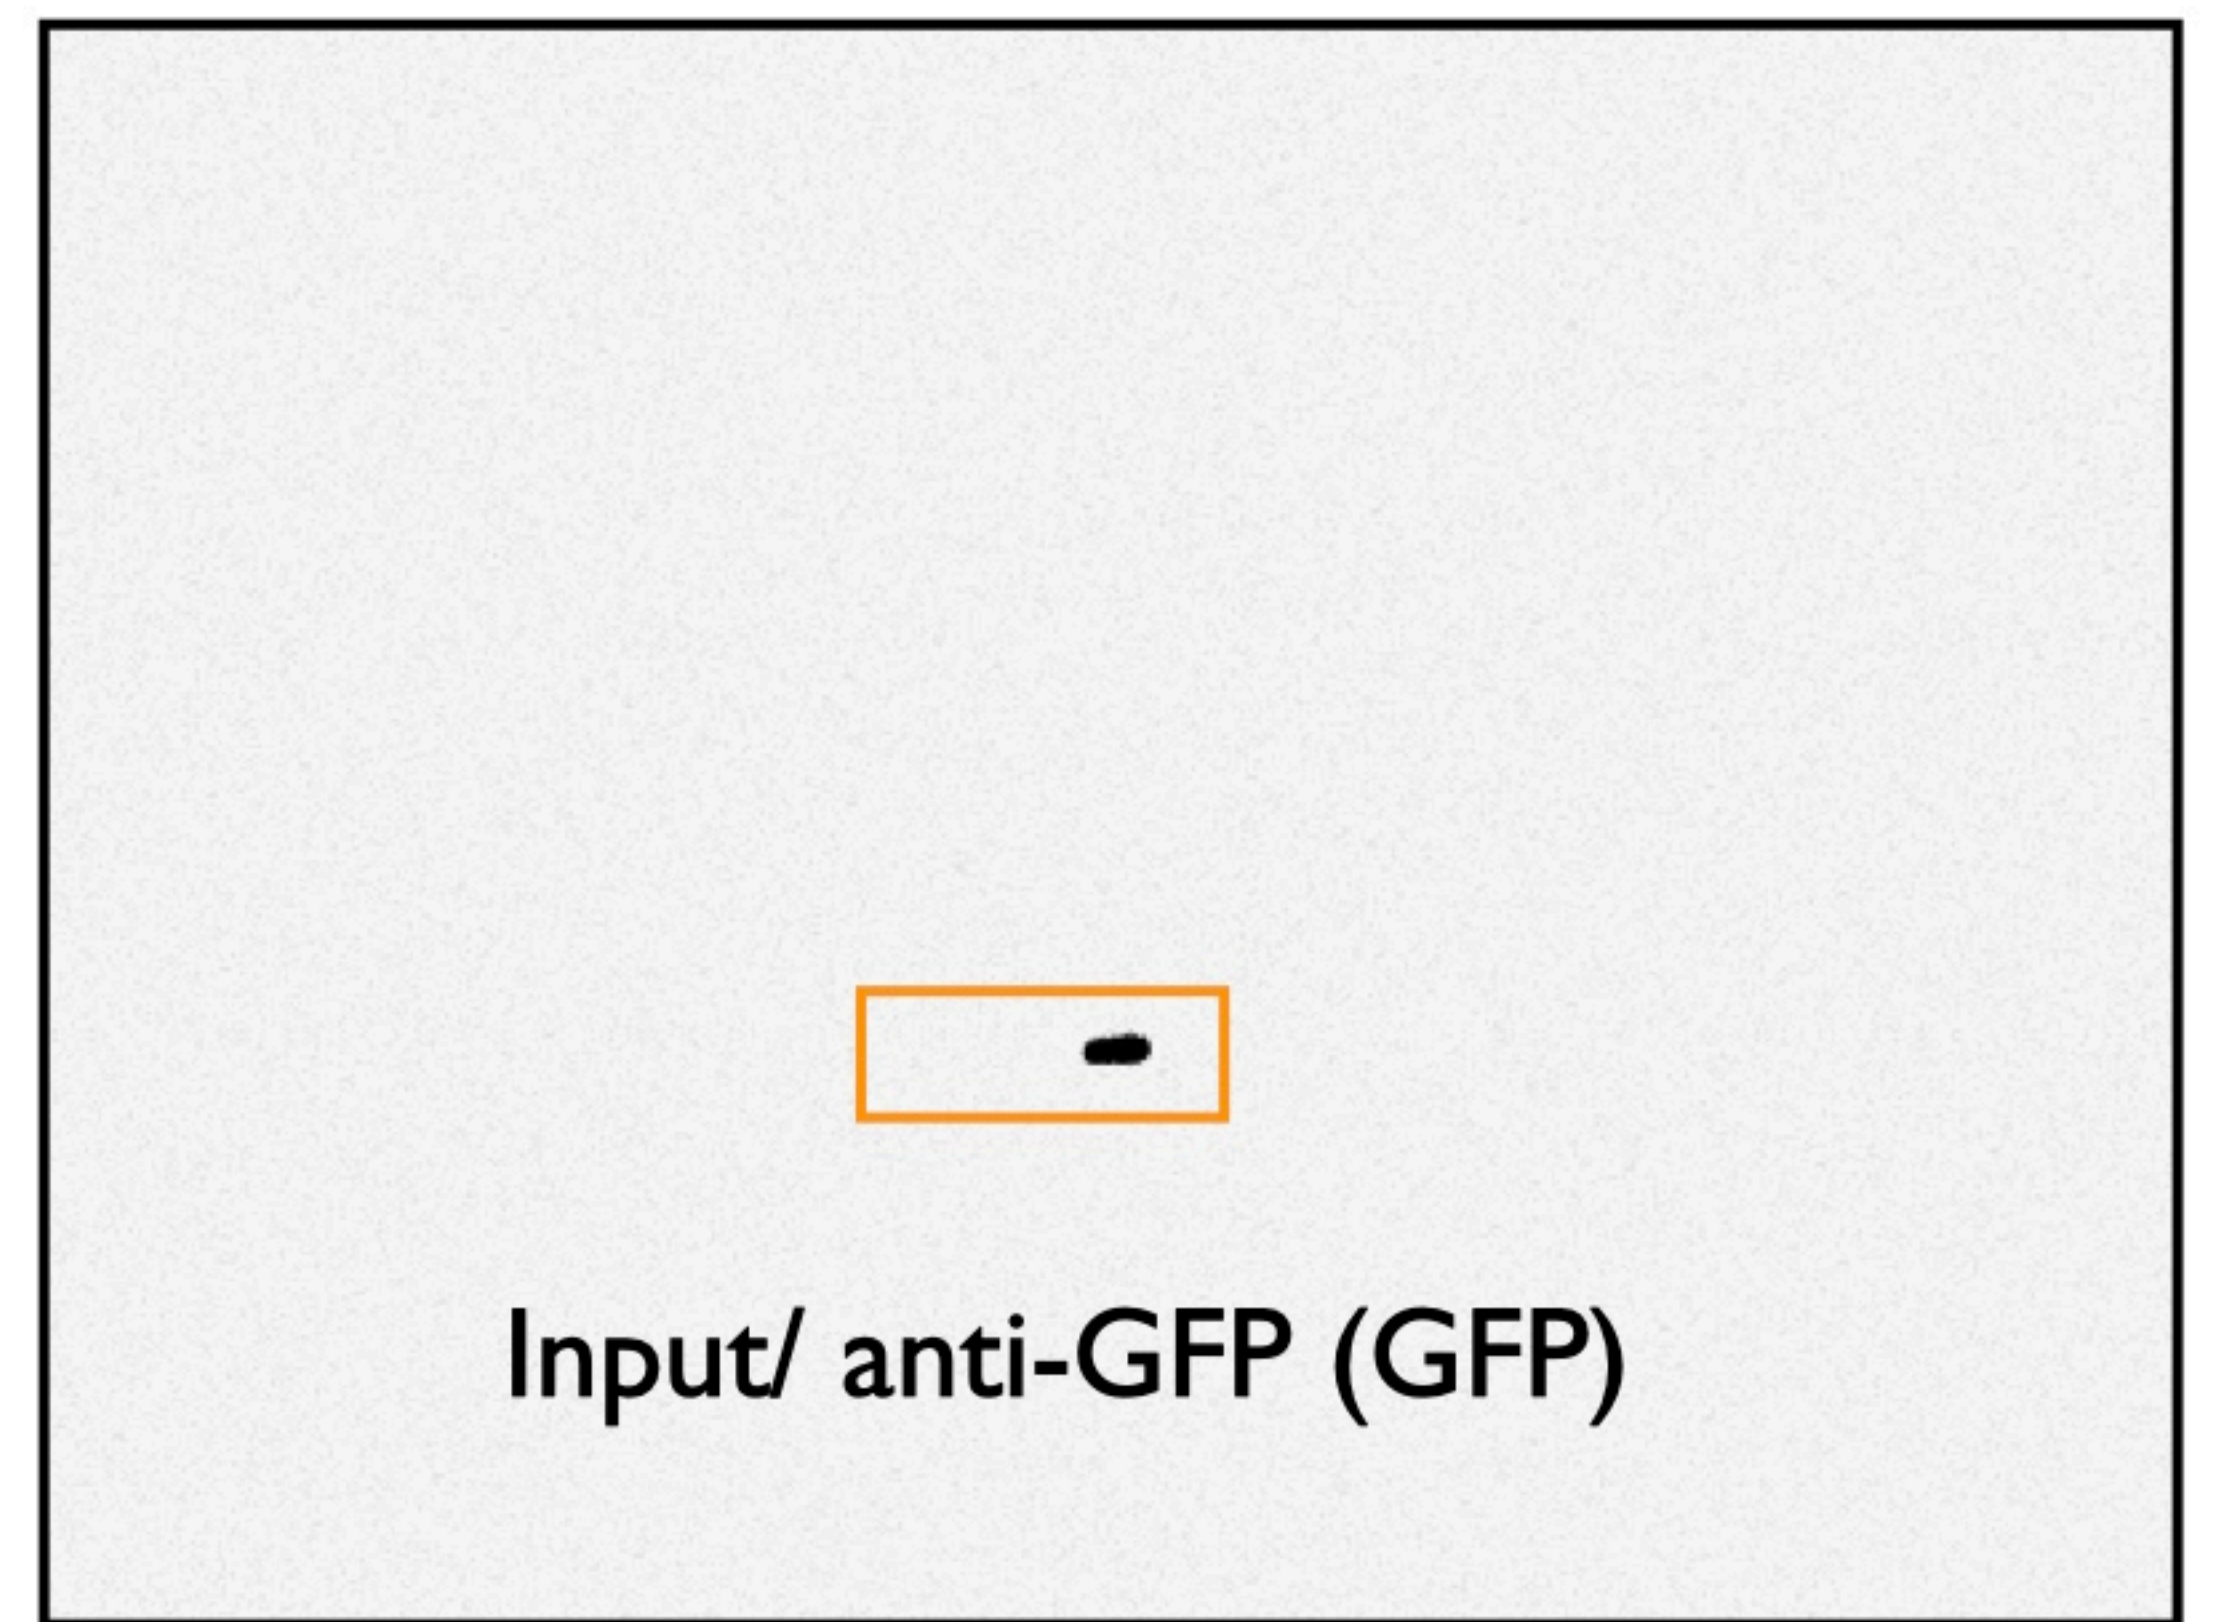

Figure S2c

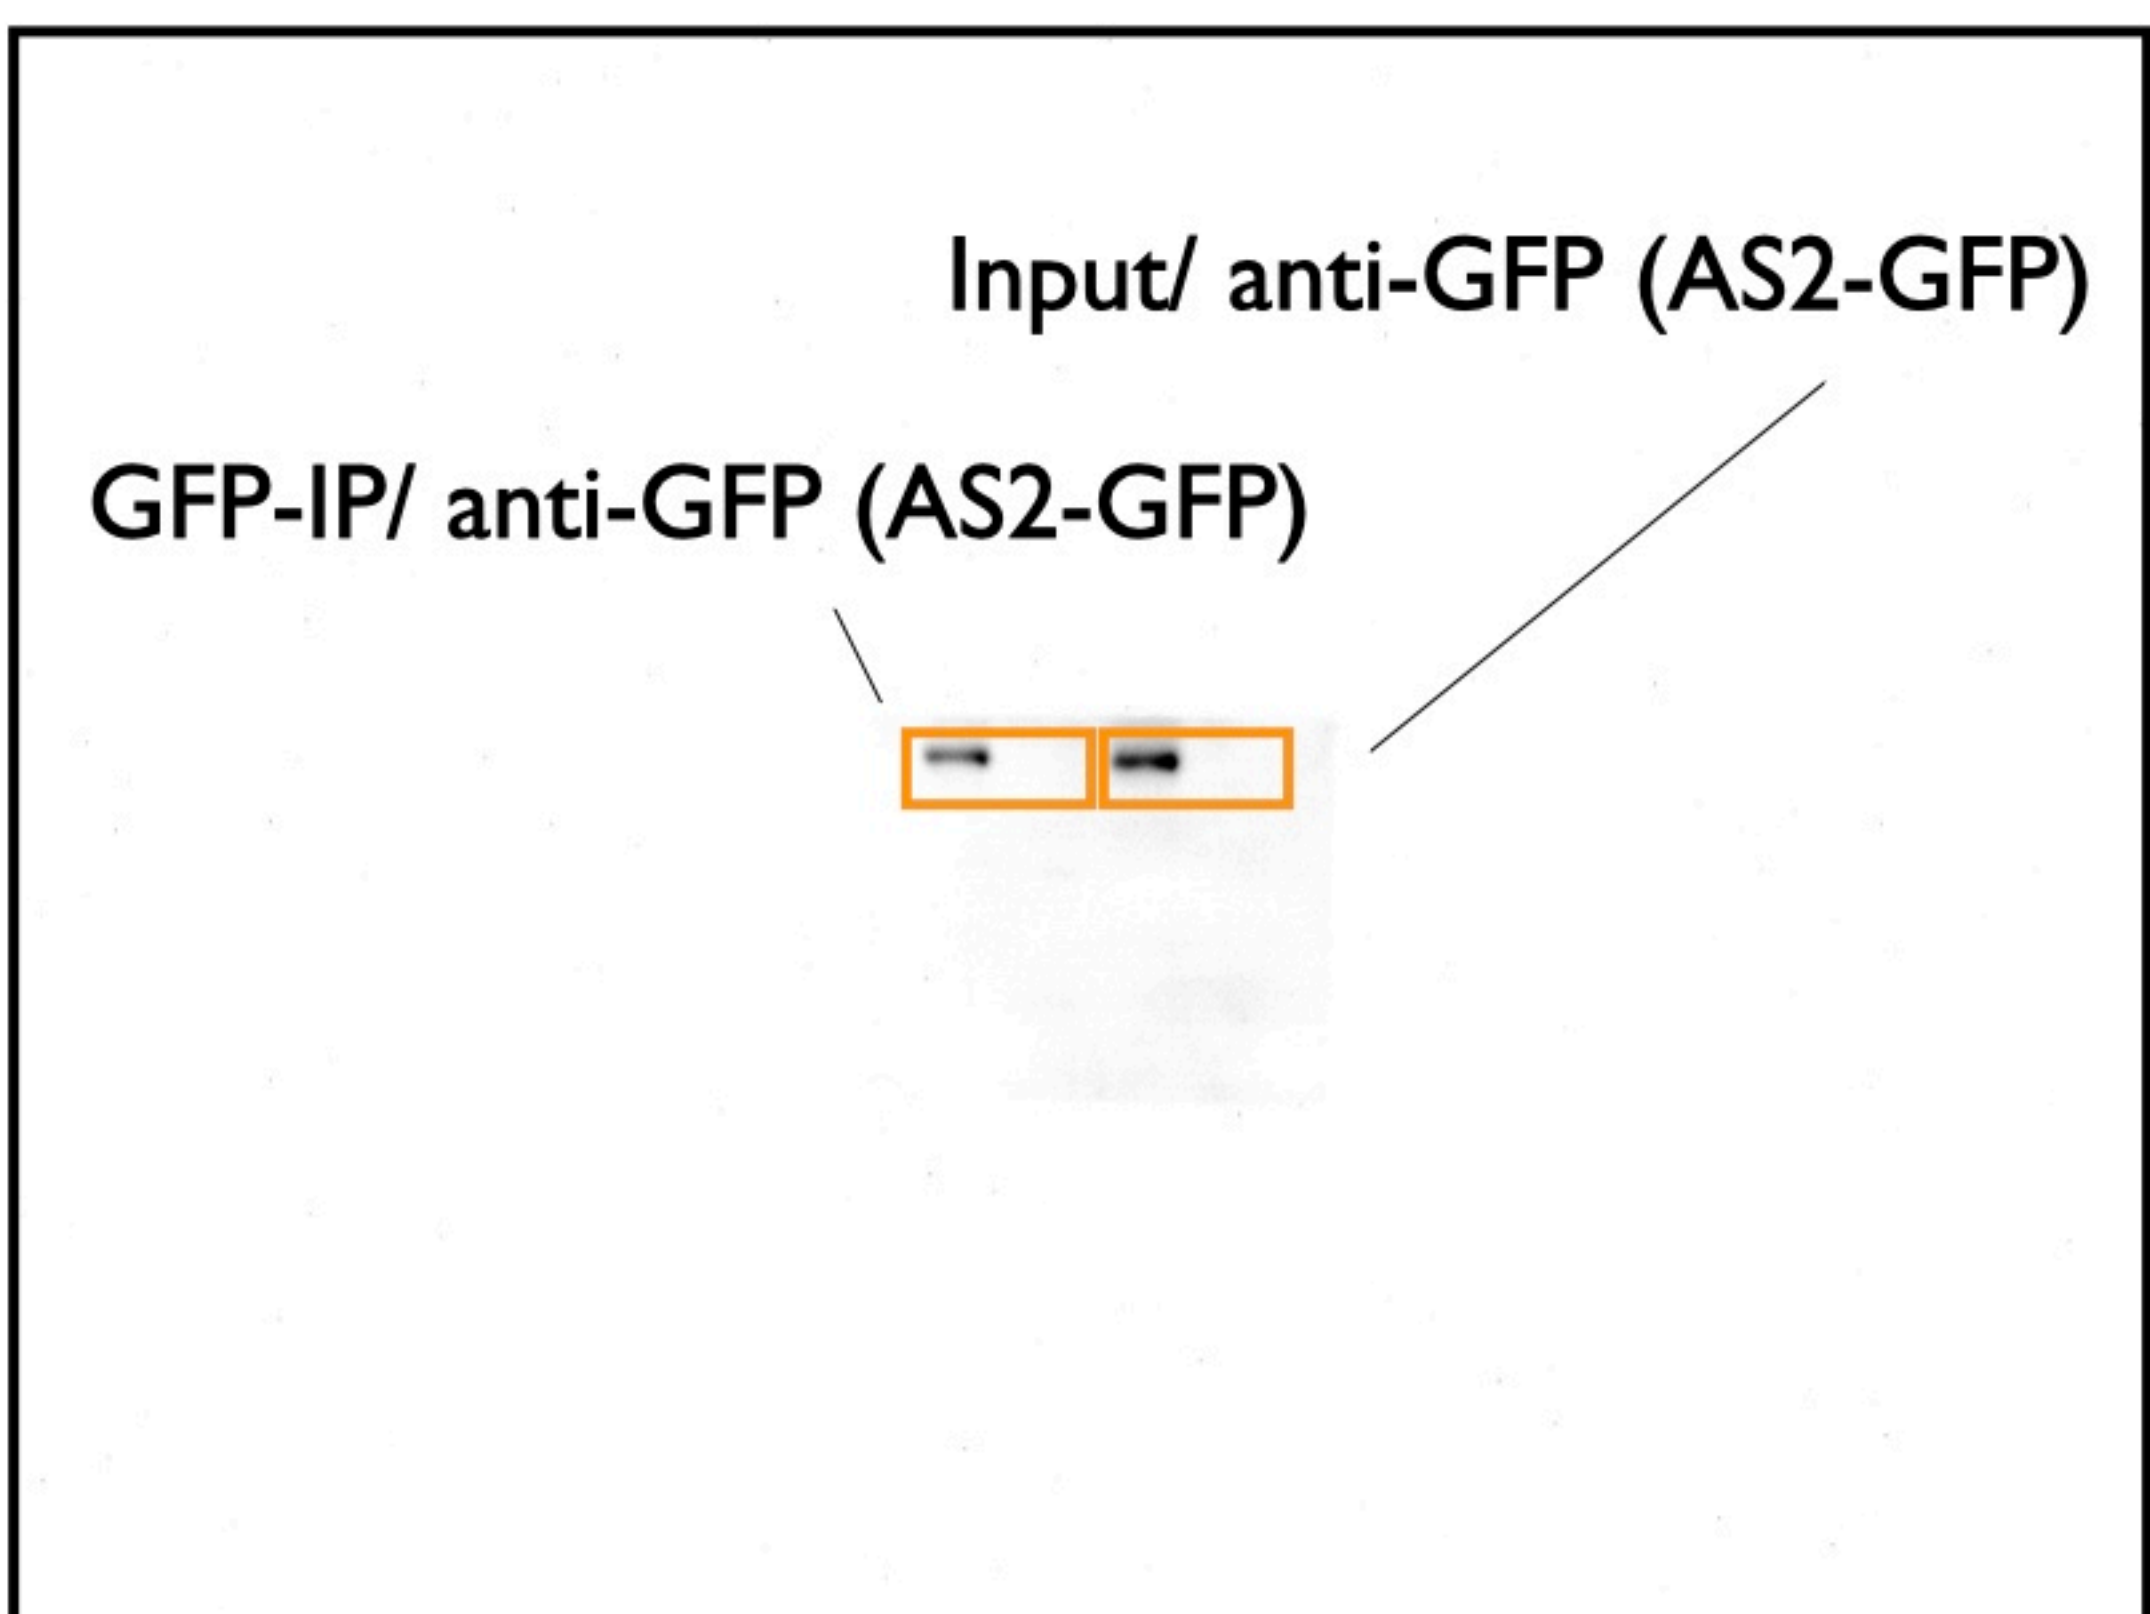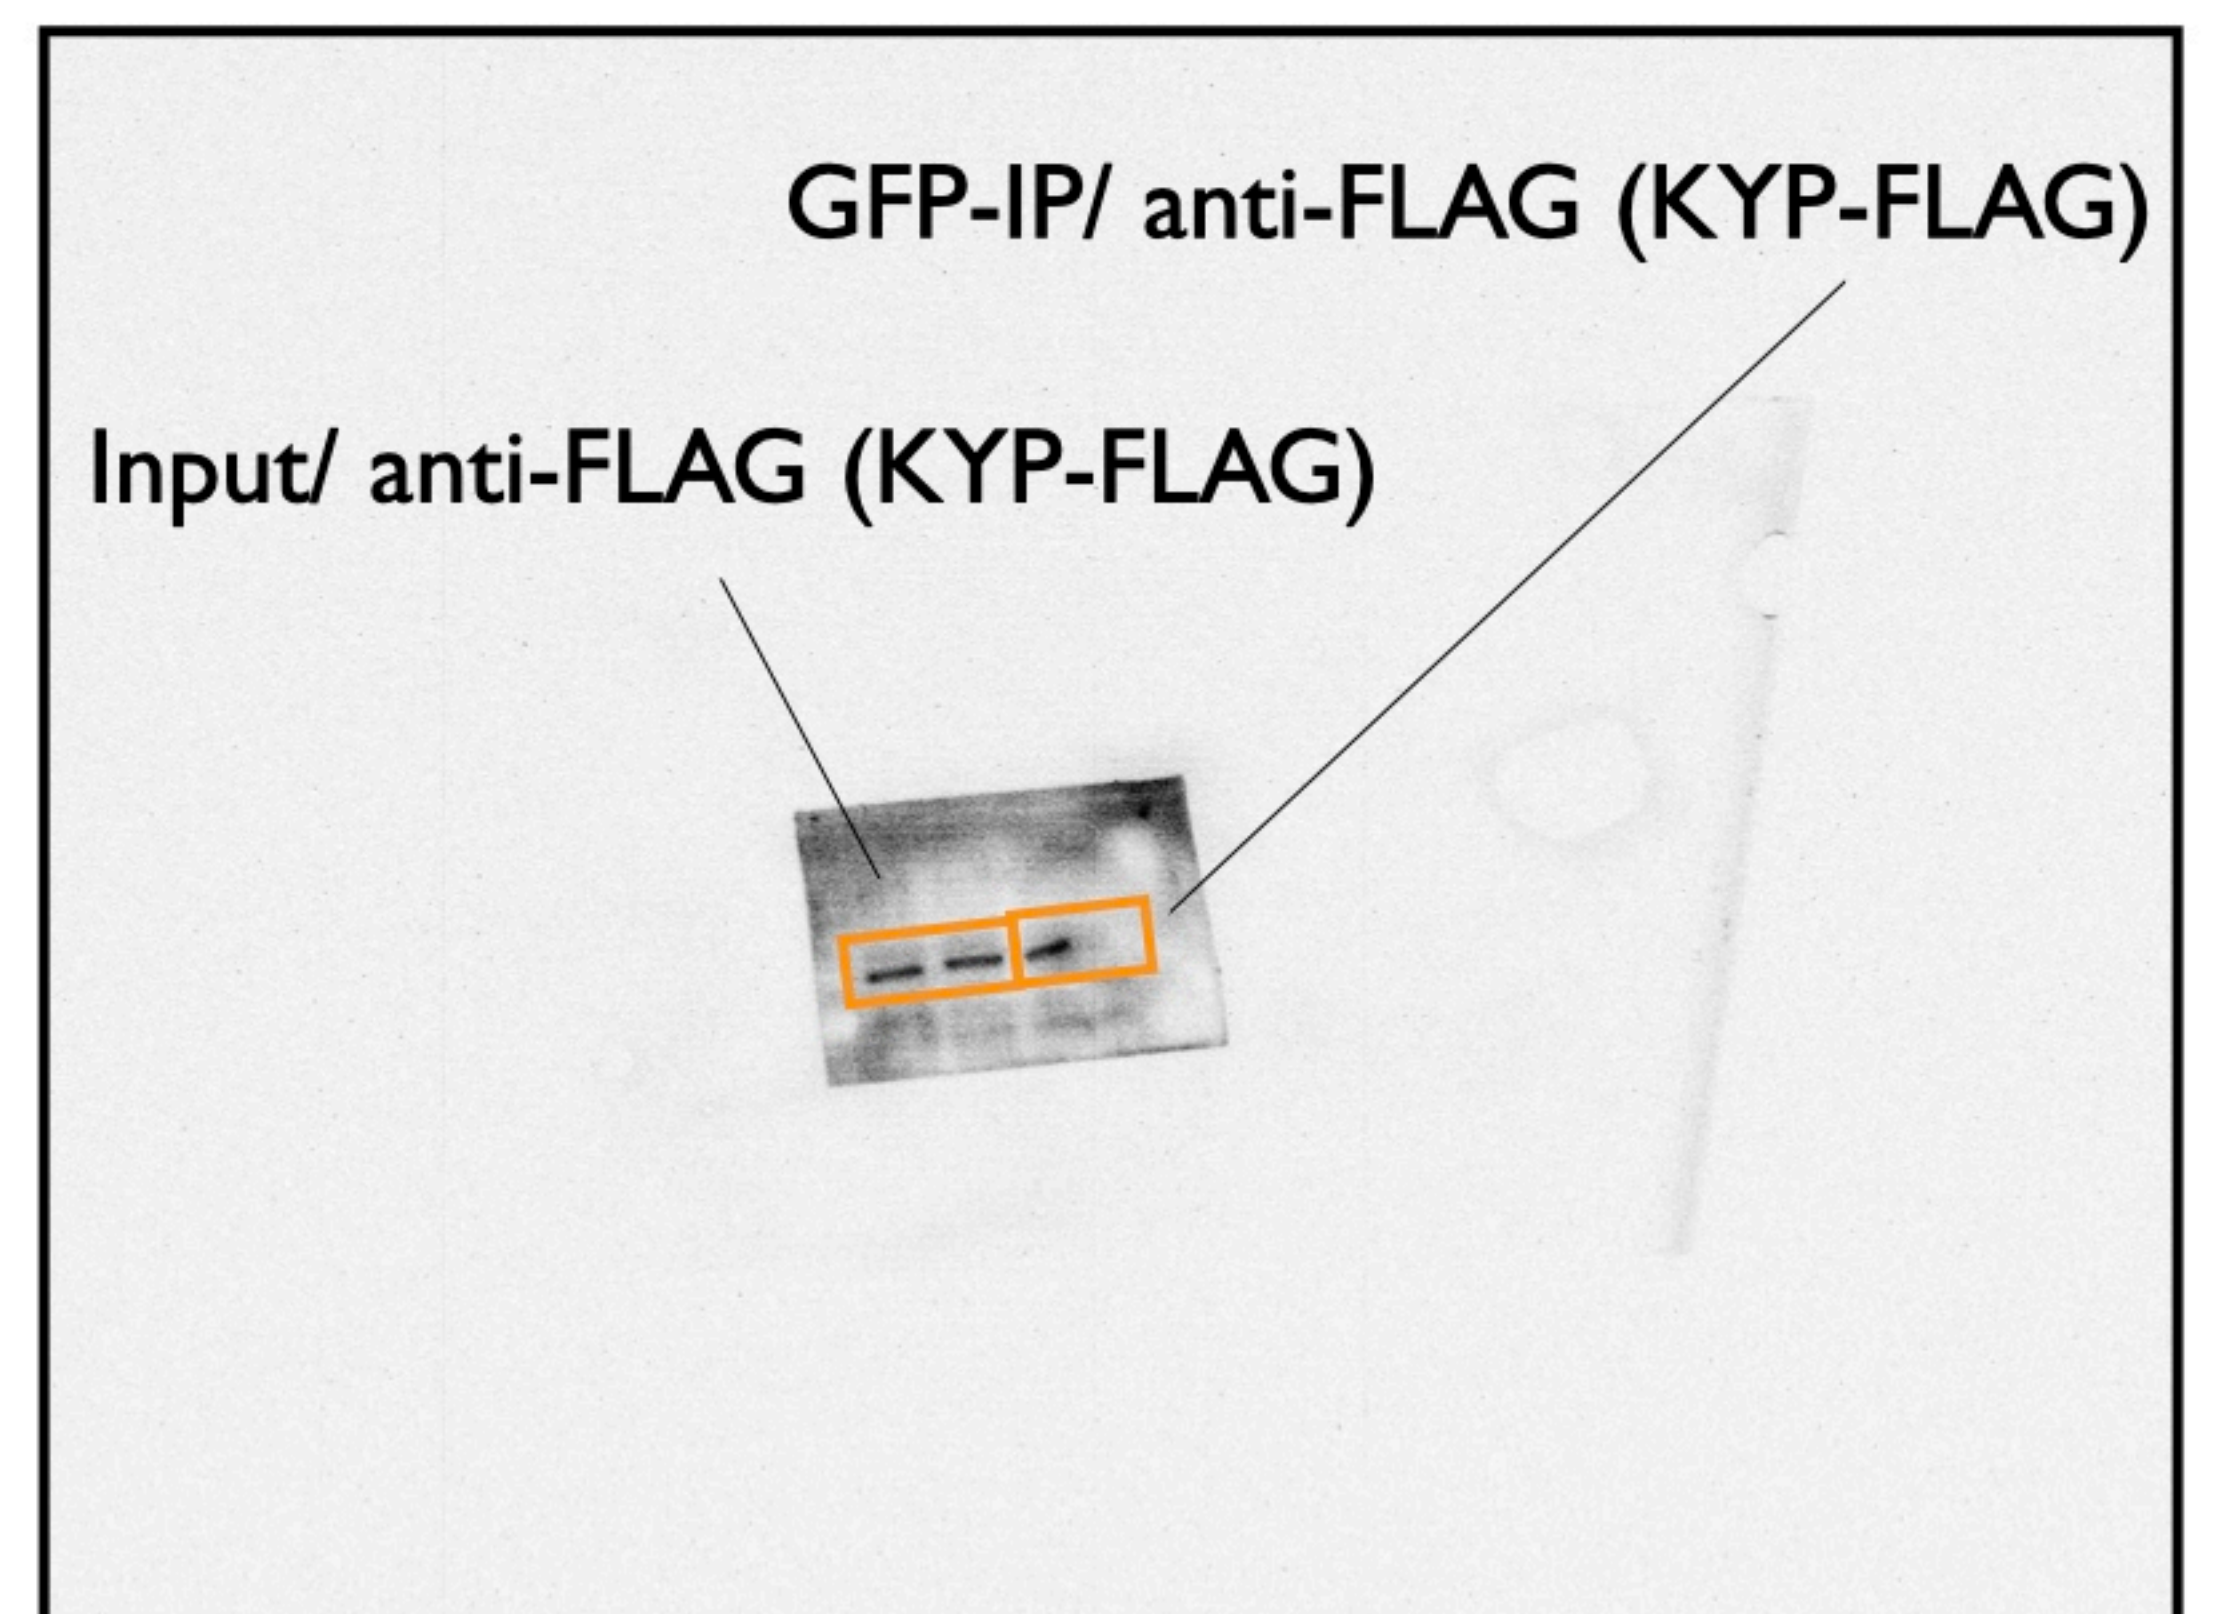

Supplement: 42003_2023_4607_MOESM2_ESM.pdf [file 42003_2023_4607_MOESM2_ESM.pdf]
