# Supplementary material for: Arabidopsis histone H3 lysine 9 methyltransferases KYP/SUVH5/6 are involved in leaf development by interacting with AS1-AS2 to repress KNAT1 and KNAT2
Source: PubMed Central journal article supplement (PMC9958104; doi:10.1038/s42003-023-04607-6), 2023-02-24
Supplement: 42003_2023_4607_MOESM3_ESM.pdf [file 42003_2023_4607_MOESM3_ESM.pdf]

## Description of Additional Supplementary Files

**File name:** Supplementary Data 1

**Description:** Genomic regions targeted by KYP.

**File name:** Supplementary Data 2

**Description:** The source data behind the graphs in the paper.
